1 **A Universal Stress Protein upregulated by hypoxia may contribute to**  
2 **chronic lung colonisation and intramacrophage survival in cystic fibrosis.**

3

4 Andrew O'Connor<sup>1</sup>, Rita Berisio<sup>2</sup>, Mary Lucey<sup>3</sup>, Kirsten Schaffer<sup>3</sup>, Siobhán McClean<sup>1</sup>

5

6

7 1. School of Biomolecular and Biomedical Sciences, University College Dublin,  
8 Belfield, Dublin 4, Ireland.

9 2. Institute of Biostructures and Bioimaging, National Research Council, Via  
10 Mezzocannone 16, I-80134 Naples, Italy.

11 3. Department of Microbiology, St. Vincent's University Hospital, Elm Park, Dublin,  
12 Ireland.

13

14 Running title: *Universal stress protein contributes to intramacrophage survival in cystic*  
15 *fibrosis*

16 Corresponding author: Dr Siobhán McClean

17 Email: [siobhan.mcclean@ucd.ie](mailto:siobhan.mcclean@ucd.ie)

18

19 **Keywords:** Respiratory infection, universal stress proteins; Cystic fibrosis, Adaptation;  
20 Chronic infection; *Burkholderia cenocepacia*

21

22

23

24 **Summary:**

25

26 Universal stress proteins (USPs) are ubiquitously expressed in bacteria, plants and eukaryotes  
27 and play a lead role in adaptation to environmental conditions. In Gram negative bacteria they  
28 enable adaption of bacterial pathogens to the conditions encountered in the human niche,  
29 including hypoxia, oxidative stress, osmotic stress, nutrient deficiency or acid stress, thereby  
30 facilitating colonisation. We previously reported that all six USP proteins encoded within a  
31 low-oxygen responsive locus in *Burkholderia cenocepacia* showed increased abundance  
32 during chronic colonisation of the CF lung. However, the role of USPs in chronic infection is  
33 not known. Using mutants derived from *B. cenocepacia* strain, K56-2, we show that USP76 is  
34 required for growth and survival in many conditions associated with the CF lung including,  
35 hypoxia, acidic conditions, oxidative stress. Moreover, it is involved in attachment to host  
36 epithelial cells, but not virulence. It also has a role in survival in macrophages isolated from  
37 people with CF. In contrast, another USP encoded in the same locus, USP92 had no effect on  
38 host cell attachment or oxidative stress, but was responsible for a 3-fold increase in virulence.  
39 Overall this shows that these USPs, both upregulated during chronic infection, have distinct  
40 roles in *Burkholderia* pathogenesis and may support the survival of *B. cenocepacia* in the CF  
41 lung. Specifically, USP76 is involved in its survival within CF macrophages, a hallmark of  
42 *Burkholderia* infection.

43

44 **Introduction:**

45 Many opportunistic bacterial pathogens must adapt as they transition from their natural  
46 environment to the host in order to survive within the host and establish an infection. Changes  
47 in temperature, pH, osmolarity and oxygen availability are among the stresses that bacteria  
48 must overcome as they move from their environmental niche to that of mammals. Universal  
49 stress proteins (USPs) are expressed by bacteria and other microorganisms in response to a  
50 wide variety of environmental conditions. They are extensively expressed throughout nature  
51 from bacteria to archaea and eukaryotes but have not been identified in humans [1]. This breadth  
52 of evolutionary range illustrates the importance of USPs in the resilience of organisms to  
53 survive in stressful environments and while their role in bacterial cells is predominantly an  
54 adaptive response to the changing environment, their contributions to bacterial pathogenesis  
55 cover a range of different mechanisms [1]. In opportunistic pathogens such as *Mycobacterium*  
56 *tuberculosis*, *Staphylococcus aureus* and *Pseudomonas aeruginosa*, USPs are involved in  
57 survival within macrophages and low oxygen conditions [2-4], while an *Acinetobacter*  
58 *baumannii* USP has a protective role against low pH and contributes to pathogenesis [5].  
59 USPs were first identified in *E.coli* K-12 following exposure of cells to a variety of stresses,  
60 heat shock, carbon and nitrogen starvation and ultraviolet radiation [6]. Expression of UspA in  
61 *E. coli* was independent of the stringent stress response transcriptional activators RelA/SpoT,  
62 RpoH, KatF, OmpR, AppY, Lrp, PhoB and H-NS [7]. *E. coli* *uspA* gene deletion mutants were  
63 defective in survival over prolonged periods of growth under stress conditions such as induced  
64 peroxide stress and osmotic shock [8]. *M. tuberculosis* USP Rv2623 contributes negatively to  
65 virulence by regulating its growth in the transition to latency [4]. There are six *usp* genes in the  
66 *E. coli* genome, while there are 10 *usp* genes encoded on the *M. tuberculosis* genome [1].  
67 *Burkholderia cepacia* complex (Bcc) is a group of Gram negative bacteria that naturally occurs  
68 in soil and in the rhizosphere of crop plants and causes chronic opportunistic life-threatening

69 infections in people with cystic fibrosis (CF) and immunocompromised patients. It can also  
70 colonise pharmaceutical plants and contaminate pharmaceutical products and disinfectants [9].  
71 It is highly antimicrobial resistant and once a chronic infection has been established,  
72 eradication is rare. Its capacity to colonise diverse and harsh niches are exemplary and  
73 consequently elucidation of its mechanisms of adaptation is essential. Sass *et al.* (2013)  
74 identified a 50 gene locus which was dramatically upregulated under low oxygen conditions  
75 and designated the low oxygen activated (lxa) locus [10]. We subsequently showed that 19  
76 proteins encoded on the lxa locus showed increased abundance in late infection isolates from  
77 chronically colonised CF patients [11]. These late chronic infection isolates also showed  
78 increased attachment to CF lung epithelial cells [12]. Importantly, all six USPs encoded on the  
79 lxa locus showed increased abundance with time of colonisation [11]. Among these lxa-  
80 encoded *usp* genes, BCAM0276, encodes a UspA family stress protein which consistently  
81 showed increased abundance in the later isolates from two chronically colonised patients and  
82 was associated with increased gene expression [11]. Previously this USP (USP76) was reported  
83 to be upregulated almost 60-fold in *B. cenocepacia* strain J2315 response to low oxygen [10]  
84 and up to 40-fold in a comparative transcriptomic study of *B. contaminans* isolates from CF  
85 patients [13]. There are 11 USPs in total encoded on the *B. cenocepacia* genome [14], ten of  
86 which are on chromosome 2. The role of USP76 or other USPs in Bcc are unknown, but this  
87 increased expression during chronic infection and under low oxygen conditions suggests that  
88 this gene may be involved in chronic persistence of *Burkholderia cepacia* complex during  
89 infection of the hypoxic CF lung. While USPs have been shown to protect bacteria from a  
90 range of environmental pressures and stresses including extreme temperature changes,  
91 antibiotic challenges, nutrient deprivation and oxidative stress, to date there are no published  
92 data on the roles of USPs in chronic infection.

93 Limited oxygen is a hallmark of the CF lung due to rapid oxygen consumption by  
94 microorganisms, invading neutrophils, impaired ventilation and contributions from mucous  
95 plugs which together create an oxygen gradient within the lung [17]. These selective pressures  
96 in CF airways drive adaptation in colonising bacteria, enabling them to overcome the various  
97 microenvironments within the CF lung during infection. Furthermore, pathogens such as Bcc  
98 can survive phagocytosis and even replicate within macrophage contributing to chronic  
99 infection [18, 19]. We derived two  $\Delta usp$  deletion mutants and demonstrate that USPs such as  
100 USP76 are at the forefront of this adaptation and may play a role in *B. cenocepacia*  
101 pathogenesis. In addition, we compare it to another USP encoded on the *lxa* locus, which has  
102 a comparable predicted size (table 1) and was also increased in abundance over time of chronic  
103 infection and show the two USPs are distinct.

104

## 105 **Results:**

106 USP76 and USP92 both belong to the UspA protein family (PF00582) and contain single UspA  
107 domain from residue 1 to 145. Both are predicted to exist as a homodimer formed largely by  
108 the C-terminus of each monomer based on Swiss-Model ExPASy modelling (Figure. 1A), which  
109 is common among other UspA molecules [20]. The BCAM0276 gene is the one of six USPs  
110 encoded on the *lxa* locus. USP76 showed 6-fold increased abundance from early to late  
111 infection in both sets of sequential isolates and was selected for detailed investigation.

112

113 **The  $\Delta usp76$  mutant has a reduced attachment to host cells.** We previously showed that the  
114 attachment of sequential *B. cenocepacia* isolates to CFBE41o<sup>-</sup> cells increased over the time of  
115 chronic infection [12]. Given the observed increase in BCAM0276 gene expression and  
116 corresponding increase in USP76 protein abundance [11], the effect of the deletion of  
117 BCAM0276 in *B. cenocepacia* strain K56-2 on attachment to cystic fibrosis epithelial cells,

118 CFBE41o<sup>-</sup> was examined. The resulting  $\Delta usp76$  mutant showed 90% reduced attachment to  
119 CFBE41o<sup>-</sup> cells ( $p < 0.05$ )(Figure 1b), which was restored to wildtype levels in the  
120  $\Delta usp76\_usp76$  complement strain. The reduction in attachment of the  $\Delta usp76$  mutant was also  
121 confirmed by confocal microscopy (a 6-fold reduction in attached  $\Delta usp76$  mutant cells  
122 compared to WT ( $p < 0.05$ , Figure 1 c and d)

123

124 **The  $\Delta usp76$  mutant elicits reduced cytokine response but does not impact on acute**  
125 **virulence.**

126 Given that deletion of the BCAM0276 gene resulted in reduced attachment to CFBE41o<sup>-</sup> cells,  
127 the secretion of IL-8 and IL-6 cytokines by CFBE41o<sup>-</sup> cells was examined to investigate  
128 whether there was a concomitant effect on cytokine secretion. IL-8 secretion was impaired in  
129 response to the  $\Delta usp76$  mutant strain (Figure 2a;  $p = 0.0135$ ) while no statistically significant  
130 effect on IL-6 relative to wild-type was observed. Despite the reduced IL-8 response of the  
131  $\Delta usp76$  mutant, both the WT and the mutant strains were highly virulent, with 0% survival at  
132 all dilutions of inoculum at 48 hours and consequently the LD<sub>50</sub> was determined at 24 hours  
133 (Figure 2c). The  $\Delta usp76$  mutant strain showed comparable virulence in the *G. mellonella* acute  
134 virulence infection model.

135

136 **USP76 is required for survival in low oxygen and under an oxidative environment.**

137 Previous studies on bacterial USPs highlight roles in survival during challenging  
138 environmental conditions [1], given the increase in BCAM0276 gene expression and in  
139 abundance of USP76, the response of  $\Delta usp76$  under various environmental pressures  
140 experienced during chronic infection was examined. It has been shown that the *lxa* locus,  
141 including the BCAM0276 gene, was dramatically upregulated in response to low oxygen [10]  
142 therefore it was important to understand if USP76 was involved in survival in response to low

143 oxygen. The K56-2 strain was unable to grow in oxygen environments lower than 6% oxygen  
144 and survival was considerably impaired at 6% oxygen (Figure 3). When exposed to 6% oxygen  
145 in a controlled hypoxia chamber, no *Δusp76* mutant cells survived to day 8, indicating that this  
146 gene is critical to survival under low oxygen. Complementation of the gene in the  
147 *Δusp76\_usp76* strain restored survival to near WT levels.

148

149 The CF lung is also characterised by constant inflammation and production of reactive oxygen  
150 species (ROS) due to persistent bacterial infections. The impact of the oxidative environment  
151 on the survival of the *Δusp76* mutant was examined using inorganic peroxide (H<sub>2</sub>O<sub>2</sub>) and  
152 organic peroxide (tert-butyl hydroperoxide). Growth of the *Δusp76* mutant was impaired when  
153 cultured in the presence of hydrogen peroxide (p = 0.0016, Figure 3b) although no significant  
154 difference in growth was observed for tert-butyl hydroperoxide over a period of 20 hours  
155 (Figure 3c, p = 0.2731).

156

157 **USP76 is required for growth and survival at acidic pH and survival in nutrient limited**  
158 **conditions.**

159 A number of bacterial USPs allow survival under acidic conditions. Growth of the *Δusp76*  
160 mutant in LB at low pH (pH 4.5) was reduced (p < 0.003) over 20 hours relative to WT when  
161 normalised for growth in LB at physiological pH (~pH 7.4, Figure 4a). Growth of the  
162 *Δusp76\_usp76* complemented strain was comparable to WT levels. When the strains were  
163 plated to determine the viable CFU remaining after exposure to acidic pH at a range of time  
164 points, it was apparent that viability of the K56-2 strain following growth in acidic conditions  
165 was also dependent on USP76 expression (Figure 4b), particularly after 2 hours exposure (p =  
166 0.0092). The *Δusp76\_usp76* complement strain initially showed impairment of viability, but  
167 this recovered over time to reach WT levels within 5 hours of exposure to acidic pH.

168

169 The effect of deletion of the BCAM0276 gene on survival under long term nutrient limited  
170 conditions was also examined over 28 days. All three strains showed reduced survival over the  
171 first 3 days in glucose free medium, however both the WT and the  $\Delta usp76\_usp76$   
172 complemented strains recovered within 5 days, reaching almost 100% survival within 20 days.  
173 In contrast, the  $\Delta usp76$  mutant strain did not recover to the same extent, reaching 50 % survival  
174 by day 28 ( $p = 0.0001$ , Figure 4c).

175

### 176 **Impact of USP76 on cellular permeability and antibiotic susceptibility.**

177 The  $\Delta usp76$  mutation had a moderate effect on cellular permeability as determined by the  
178 uptake of the cell permeable Hoechst dye over a two-hour period ( $p < 0.0001$ ; Figure S1). The  
179  $\Delta usp76\_usp76$  complement showed much higher fluorescent intensity than the WT and  $\Delta usp76$   
180 strains, possibly due to the deletion of the BCAL1674-1675 encoded efflux pump during the  
181 complementation process, which resulted in greater accumulation of Hoechst 33324 dye. In  
182 contrast to the alteration in cellular permeability, the BCAM0276 gene did not have any role  
183 in survival in response to antibiotic challenges encountered during treatment for CF infection.  
184 Growth following exposure to antibiotics with a range of mode of actions (Meropenem,  
185 Levofloxacin, Ceftazidime and Polymyxin B) was comparable for the WT and the  $\Delta usp76$   
186 mutant strains ( $p = 0.909$ ) (Figure S2, S3). The CF lung and the airway surface liquid also  
187 represent high salt environments with 1% w/v NaCl concentrations reported for the ASL of  
188 people with CF compared to 0.7% in healthy controls [21]. This creates osmotic stress on any  
189 pathogens colonising the CF lung. Growth of the  $\Delta usp76$  mutant was comparable to that of the  
190 WT strain over a range of salt concentrations (0 to 5% NaCl,  $p = 0.72$ ) indicating that USP76  
191 does not play a role in the salt tolerance of *B. cenocepacia* (Figure S4).

192



193 **Deletion of *usp76* has no effect on mucoidy, motility or biofilm formation.**

194 Alterations in mucoid phenotype have been associated with chronically infecting Bcc isolates  
195 [22], however, deletion of the *usp76* gene did not impact on EPS production when grown on  
196 YEM agar plates in either normoxic or hypoxic conditions (Figure S5, Table S3). Motility was  
197 comparable between the WT and the  $\Delta usp76$  mutant strain (Figure S6). No statistically  
198 significant differences were observed for motility phenotype when analysed by ANOVA,  
199 swimming  $p = 0.9720$ , swarming  $p = 0.2044$  and twitching  $p = 0.4226$ . In addition, the ability  
200 for *B. cenocepacia* to form biofilms was not affected by the presence of the *usp76* gene (Figure  
201 S7) under normal oxygen conditions or hypoxic conditions.

202

203 **USP76 is required for survival of *B. cenocepacia* in CF macrophages.**

204 Bcc can survive and replicate within macrophage [18] allowing the organism to evade both  
205 host immune response and antibiotic treatments. Given that the pH of the intramacrophage  
206 phagosome is estimated to be between 6.2 and 4.5, and that we have shown that the  $\Delta usp76$   
207 mutant is more susceptible to low pH and oxidative induced stress, we wanted to investigate  
208 whether USP76 might contribute to the survival of *B. cenocepacia* inside macrophages. Firstly  
209 we examined whether the intracellular uptake into the U397 macrophage-like cell line was  
210 altered by the presence or absence of USP76 and found that there was a 60% reduction in the  
211 number of the  $\Delta usp76$  mutant cells that are internalised by the U937 line compared to WT  
212 (Figure 5a,  $p = 0.002$ ). Phagocytosis of the  $\Delta usp76\_usp76$  complement strain was equivalent  
213 to that of WT. Survival of the  $\Delta usp76$  mutant within U937 macrophages cells was also  
214 significantly impaired at 24 h (Figure 5b,  $p = 0.0378$ ). In contrast survival of the complemented  
215 strain was restored to wild type levels. Acidification is impaired in CF macrophages due to the  
216 dysfunctional CFTR, consequently, in order to examine whether this had relevance in the CF  
217 context, we sought ethics approval to investigate the survival of the strains in PBMC-derived

218 macrophages from 12 people with CF. PBMC samples from five subjects could be successfully  
219 differentiated to macrophage cells in sufficient numbers to be suitable for use in uptake and  
220 intracellular assays. The uptake of the  $\Delta usp76$  mutant strain by PBMC-derived macrophage  
221 from two patients was significantly reduced (\*\* $p = 0.0018$ , \*\*\* $p = 0.0004$ ) when compared to  
222 the WT strain. More importantly, intracellular survival of the  $\Delta usp76$  mutant was assessed in  
223 CF patient derived macrophage cells, and showed significantly reduced survival in four out of  
224 five macrophage preparations (Figure 6b) ( $0.05 < p > 0.0001$ ).

225

### 226 **The USPs encoded in the *lxa* Locus are not redundant.**

227 As previously mentioned there are six USPs encoded on the *lxa* locus, all of which showed  
228 increased abundance in late stage isolates from chronically colonised people with CF. Having  
229 characterised USP76, we wanted to examine whether other USPs expressed within the locus  
230 share the same functions. We chose a *uspA* gene downstream of BCAM0276 as it was  
231 upregulated by 201-fold in response to low oxygen and showed greatest increase in protein  
232 abundance (up to 16 fold) in late stage isolates [10, 11]. A targeted single deletion mutant was  
233 generated for the BCAM0292 gene; however, despite many attempts we were unable to  
234 complement the strain with the BCAM0292 gene. Using the targeted deletion mutant,  $\Delta usp92$ ,  
235 the role of USP92 was characterised and compared with USP76. Consistent with  $\Delta usp76$ , the  
236  $\Delta usp92$  mutant showed impaired growth under acidic conditions, relative to the WT strain K56-  
237 2 (Figure 7,  $p < 0.001$ ). But in contrast to the  $\Delta usp76$  mutant, the  $\Delta usp92$  mutant showed a  
238 three-fold reduction in virulence as determined by LD<sub>50</sub> in *G. mellonella* larvae relative to the  
239 WT strain ( $p = 0.0228$ , Figure 7). Moreover, the  $\Delta usp92$  mutant showed slower growth in the  
240 presence of high salt (Figure 7c  $p < 0.001$ ) in contrast to  $\Delta usp76$ . USP92 may also confer slight  
241 but significant protection against sucrose at 2.5% ( $p = 0.04$ ) and 5% w/v sucrose ( $p =$   
242  $0.005$ )(Figure S8a). Furthermore, the  $\Delta usp92$  mutant also showed a slight but significantly

243 reduced uptake of the cell-permeable Hoechst dye ( $p < 0.001$ ). In contrast to the  $\Deltausp76$   
244 mutant, no significant change in CBE41o<sup>-</sup> cell attachment was observed in the  $\Deltausp92$  mutant  
245 compared with the WT strain (Figure S8b). Moreover, while USP76 seemed to be involved in  
246 survival in response to oxidative stress, the USP92 does not, with the  $\Deltausp92$  mutant showing  
247 comparable growth in the presence of hydrogen peroxide (Figure S8c). Consistent with the  
248  $\Deltausp76$  mutant, there was no alteration in EPS production in the  $\Deltausp92$  mutant under  
249 normoxic conditions when compared to the WT strain (Figure S9a) nor were there significant  
250 difference in antibiotic susceptibility observed (Figure S9 b,c).

251

252 **Structural features of USP76 and USP92 explain their differential host cell attachment**  
253 **abilities.**

254 To identify structural determinants responsible for the different behaviours of USP76 and  
255 USP92, in particular their different abilities to bind to epithelial cells, we used homology  
256 modelling and analysed resulting structures. Both structures are highly reliable, given the high  
257 sequence identities with their template structures. The two protein structures share a similar  
258 dimeric organisation (Figure 8), consistent with their relatively high sequence similarity  
259 (sequence identity =41.8%). Each monomer is composed of an open-twisted, five-strand  
260 parallel  $\beta$ -sheet, sandwiched by two  $\alpha$ -helices on each side of the sheet ( $\alpha1$ - $\alpha4$  in Figure 8) and  
261 present structural features of ATP binding proteins. In both models, a wide ATP binding cleft  
262 runs adjacent to the central  $\beta$ -sheet and contacts the  $\alpha$ -helices  $\alpha1$ ,  $\alpha3$  and  $\alpha4$  of each monomer  
263 (Figure 8).

264 Strong differences between the two proteins are evident when electrostatic potential surfaces  
265 are compared. Indeed, an overall negative electrostatic potential surface characterises USP92,  
266 with only two positively charged patches due to Arg119-120 and Arg136 (Figure 9). Consistent  
267 with a higher pI value of USP76 (pI=7.8) compared to USP92 (pI=5.0), the electrostatic

268 potential surface of USP76 presents several clusters of positively charged residues on the entire  
269 surface of the protein, due mostly to arginine residues (Figure 9).

270

## 271 **Discussion:**

272 A hallmark of genus *Burkholderia* is its remarkable ability to survive and thrive in a range of  
273 diverse environments, ranging from the soil, aquatic niches, disinfectants to the human host.

274 Its ability to adapt to changing environments contributes to its success as a human pathogen.

275 In this study we demonstrate that USPs support intramacrophage survival of *B. cenocepacia*  
276 and consequently may play an important role in the chronic colonisation of *B. cenocepacia* in

277 people with cystic fibrosis. USPs are ubiquitous proteins which play a wide array of protective  
278 roles in bacterial pathogens and appear to be central to pathogenesis of intracellular pathogens.

279 *B. cenocepacia* expresses 11 USPs. Six of these are encoded within the *lxa* locus, all of which  
280 increase in abundance in chronic infection and show increased expression in response to low

281 oxygen [10, 11]. Despite the upregulation in response to low oxygen and chronic infection, we

282 now show that USP76 and USP92 have quite distinct roles in *B. cenocepacia*, highlighting a

283 clear lack of redundancy in these USPs. Moreover, we have shown that USP76, in particular,

284 is likely to be important for survival of *B. cenocepacia* in CF macrophage, a significant

285 characteristic of this pathogen.

286 To elucidate the role that both USPs play in Bcc chronic infection, we examined a series  
287 of phenotypes associated with environmental pressures experienced during chronic infection

288 or associated with Bcc virulence. The CF lung has profoundly low pO<sub>2</sub> due to a combination

289 of disease associated issues including mucous plugging, constant neutrophilic inflammation

290 and increased epithelial oxygen consumption [17, 26]. Oxidative stress in the CF lung

291 contributes to the cycle of inflammation and is an inherent feature of CF [27]. Four key

292 phenotypes relating to growth and/or survival under conditions typical of the CF lung were

293 significantly altered in the  $\Delta usp76$  mutant compared to the wildtype strain: hypoxia, low pH,  
294 induced oxidative stress and nutrient starvation. Therefore, it is clear that USP76 (but not  
295 USP92) protects *B. cenocepacia* against oxidative stress. UspA gene deletion mutants in  
296 *Listeria monocytogenes* also had impaired growth when exposed to oxidative stress [28].  
297 Similarly, *E. coli* UspA and UspD mutants were more susceptible to oxidative and superoxide  
298 stress [8, 29]. *L. monocytogenes* UspA mutants exposed to acidic stress were also previously  
299 found to have reduced cellular growth, albeit at a lower pH (pH 2.5) than that used by us [28].  
300 In addition, an *A. baumannii* UspA mutant was also shown more susceptible to low pH and  
301 also oxidative stress [5]. Overexpression of a mycobacteria USP encoded by RV2624c  
302 increased survival in hypoxic conditions [30].  
303 Previous reports showing that a *L. monocytogenes* UspA protected against low pH, oxidative  
304 stress and enhanced survival within murine macrophage [28], led us to evaluate whether USP76  
305 also contributed to the survival of *B. cenocepacia* in macrophages, particularly given that  
306 USP76 was also protective in oxidative stress and involved in host cell attachment, in contrast  
307 to USP92. The impaired survival of the  $\Delta usp76$  mutant in U937 macrophage cells and,  
308 crucially, our finding that survival was significantly impaired in 80% of the CF-patient derived  
309 macrophage samples confirms that USP76 confers a clear survival advantage to *B. cenocepacia*  
310 inside macrophage cells. People with CF can have impaired macrophage function, which can  
311 lead to altered phagocytosis and killing of bacteria [31], consequently the role of USP76 in  
312 uptake and survival in CF-patient derived macrophages is particularly noteworthy. Given that  
313 impaired survival of the  $\Delta usp76$  was not evident in all CF-patient derived macrophages  
314 samples, it is clear that host factors also play a role. The BCAM0276 gene was previously  
315 shown to be upregulated when *B. cenocepacia* strain K56-2 was internalised in murine  
316 macrophages [32]. This work now confirms that USP76 contributes to survival of *B.*  
317 *cenocepacia* within the CF lung and also within the CF macrophage. Moreover, our previously

318 observed increase in abundance of USP76 in chronically colonised patients indicates that  
319 USP76 is very likely to be a major player in facilitating the long-term survival of this pathogen  
320 within macrophages of CF patients.

321 The role of USP92 is distinct from that of USP76, as the two proteins are involved in  
322 determining different subsets of phenotypes (Table 2). Although both USPs protect the  
323 bacterial cell from acidic stress, only USP92 has a role in growth in the presence of osmotic  
324 stress. Moreover, we observe that USP92 is important for virulence in the acute larval infection  
325 model, in contrast to USP76, albeit not involved in host-cell attachment. The protective role  
326 against osmotic stress is critical in the context of CF airway surface liquid and may contribute  
327 to protection of *B. cenocepacia* in CF sputum. USPs in other species, e.g. atypical *E. coli*, have  
328 also been shown to be involved in salt tolerance [33].

329 Different roles for individual USPs expressed by a bacterial species have previously  
330 been observed in *E. coli*. Opposing roles in attachment have previously been reported for  
331 different USPs expressed in *E. coli*; with UspC and UspE mutants showing enhanced host cell  
332 attachment and loss of motility while UspF and UspG mutants had reduced host cell attachment  
333 and maintained cell motility [34]. Moreover, *E. coli* UspA and UspD were required for  
334 protection against oxidative stress while UspC and UspE were not. In *B. cenocepacia* opposing  
335 roles in membrane permeability were also observed for USP76 and USP92, with the  $\Delta usp76$   
336 mutant having reduced permeability while the  $\Delta usp92$  mutant had increased permeability  
337 relative to the WT strain. A role in permeability would not be expected for cytosolic proteins  
338 that are expressed without signal peptides (likelihood of 0.0104) (SignalP-5.0). Yet the  
339 responses to Hoechst indicates that both these USPs may interact with the cellular membrane.  
340 The role of USP76 in host cell attachment strengthens this view. We have identified USPs,  
341 including USP76, among many cytosolic proteins in the outer membrane vesicles (OMVs)

342 released from *B. cenocepacia* strain by proteomic analysis (unpublished data), and their  
343 presence in OMVs may provide a mechanism by which USPs can impact on the cell surface.  
344 As with USP76, *E.coli* USPs have also been linked to cell adhesion when mutants were  
345 assessed by yeast agglutination, with mutants of UspC and UspE enhancing cellular  
346 attachment, USPs F and G reducing in attachment [34]. The surface arginine residues on  
347 USP76 are likely to be involved in electrostatic interactions with sulfonate and carboxylate  
348 groups heparan sulphate, a negatively charged linear sulphated glycosaminoglycan (GAG) on  
349 the surface of epithelial cells. Indeed, it is well established that interactions of heparan sulphate  
350 with proteins are primarily driven by ion pair interactions mediated by surface regions rich in  
351 lysines and/or arginines, as in the case of the HBHA protein of *M. tuberculosis* [23-25].  
352 Interestingly, macrophage cells increase expression of heparan sulphate under chronic  
353 inflammatory conditions, which would confer additional advantages on Bcc [36]. We speculate  
354 that USP76 is released from *B. cenocepacia* in OMVs, coating the bacterium and enhancing  
355 attachment to both macrophage and epithelial cells conferring a major advantage in its survival  
356 in the CF lung and increasing colonisation fitness. OMV released by *Vibrio cholerae* play a  
357 comparable role in surface adaptation in vivo [37], and this will hypothesis will need to be  
358 evaluated in *B. cenocepacia*.

359         USPs are clearly critical for an environmental bacterium such as *Burkholderia* to cope  
360 with the breadth of stressful conditions that it is exposed to in soil. However, it is now clear  
361 that USPs also confer substantial advantages on opportunistic pathogens adapting to the niche  
362 environment of the CF lung. In particular, USP76 is a major contributor to macrophage  
363 survival, while USP92 may confer advantages in the extracellular milieu, such as in CF  
364 sputum. Furthermore, the enhanced expression of both USPs over the course of chronic  
365 infection indicates that they play a role in the adaptation to chronic infection and represent  
366 interesting targets to overcome chronic colonisation.

367

## 368 **Experimental Procedures:**

### 369 **Bacterial Strains and Growth Conditions**

370 Strains and plasmids used in this study are listed in table S1. Bacteria were routinely grown at  
371 37°C in Luria-Broth (LB) medium with orbital shaking (200 rpm) unless otherwise stated.  
372 Antibiotics, when required, were added to reach final concentrations as follows: 50 µg/ml  
373 trimethoprim for *E. coli* and 100 µg/ml for *B. cenocepacia* and 40 µg/ml kanamycin for *E. coli*.

374

### 375 **Mammalian Cell Culture**

376 Cystic fibrosis epithelial cells, CFBE41o<sup>-</sup> which are homozygous for the ΔF508 mutation of  
377 the CFTR gene were routinely cultured in collagen/fibronectin coated flasks as previously  
378 described [12]. The U937 macrophage cells were maintained as a suspension culture in  
379 complete RPMI medium (Sigma-Aldrich) supplemented with 1 mM sodium pyruvate, 10 mM  
380 4-(2-hydroxyethyl)-1-piperazineethanesulfonic acid (HEPES) buffer (pH 7.0 – 7.6), 1 mg /100  
381 units streptomycin / penicillin, 10 % (v/v) FBS and 5 g/L D-glucose. U937 cells were plated in  
382 24-well plates and after 24 h were induced to differentiate by the addition of 15 ng/ml of  
383 phorbol 12-myristate 13-acetate (PMA) for 24 hours in full RPMI medium.

384

### 385 **Construction of Δusp mutants and complementation.**

386 Targeted gene deletions of BCAM0276 or BCAM0292 in the *B. cenocepacia* strain K56-2  
387 were performed as described [38]. The amplicons used to construct the mutagenic plasmid  
388 were cloned into pGPI-SceI-2 digested with *EcoRI* and *NheI*, using triparental mating, followed  
389 by biparental mating to introduce the I-SceI endonuclease. Screening was performed on the  
390 resulting colonies from bi-parental mating to determine if successful gene deletion had taken  
391 place. Trimethoprim sensitive colonies were screened for gene deletion using the US forward



392 DS reverse primers (Table S2) and mutants were sent for sequencing to confirm sequence  
393 deletion and stocks in glycerol prepared. To complement *B. cenocepacia* K56-2 $\Delta$ BCAM0276,  
394 wild-type BCAM0276 was amplified from *B. cenocepacia* K56-2 with the complementation  
395 primer pair (Table S2), digested with the restriction enzymes *NdeI* and *XbaI* and ligated into  
396 similarly digested pMH447 [39]. The complementation plasmid was introduced into the mutant  
397 by conjugation. Once transferred into the target mutant strain the complementation vector  
398 integrates into the genome at aminoglycoside efflux genes (*BCAL1674-BCAL1675*), due to  
399 sequence homology between the vector and target genome [40]. As before, pDAI-Sce-I, was  
400 then introduced resulting in the replacement of BCAL1674-1675 by BCAM0276. The  
401 complementation of the BCAM0276 gene was confirmed by PCR and by phenotype analysis.  
402 Following genetic manipulation of *B. cenocepacia* K56-2 strain during gene deletion and  
403 subsequent complementation, the presence of the plasmid pC3 was confirmed using three sets  
404 of primers designed for genes RepA, oriC and dopC. The pC3 plasmid is a non-essential  
405 replicon of *B. cenocepacia* and encodes for a number of virulence factors [41], which can be  
406 lost during genetic manipulation. PCR was performed on confirmed mutants and complements  
407 using primers 3001/3002, 3003/3004 and 3005/3006.

408

#### 409 **Bacterial attachment to human CF epithelial cells.**

410 CFBE410<sup>-</sup> cells were seeded in wells of a 24-well plate at a density of  $4 \times 10^5$  cells / well in  
411 antibiotic free medium and incubated overnight. The cells were then washed three times with  
412 PBS and the mid-logarithmic phase bacterial cultures ( $OD_{600nm}$  0.6-0.8) were resuspended in  
413 MEM and added to each well at a concentration of  $2 \times 10^7$  CFU / well (MOI 50:1). The plates  
414 were centrifuged at  $252 \times g$  for 5 min and incubated for 30 min at 37°C, 5% CO<sub>2</sub> to allow for  
415 bacterial adherence. Wells were then washed with PBS and lysis buffer (0.25 % Triton X-100  
416 in PBS) added to each well for 20 min at RT. Cell lysates were plated onto LB agar in duplicate

417 and incubated at 37°C for 48 hours. Resulting colonies were counted and the CFU/ml  
418 determined. For microscopic visualisation of attachment, CFBE41o<sup>-</sup> cells were seeded in  
419 chamber slides (LabTek™) and incubated with bacteria for 30 min and washed with PBS as  
420 outlined above. CFBE41o<sup>-</sup> cells and adherent bacterial cells were fixed using 3 % w/v PFA  
421 (pH 7.2) for 10 min at RT, washed with PBS and blocked with 5 % BSA in PBS for one hour  
422 at RT. Cells were then incubated with a rabbit anti-Bcc antibody (courtesy of Prof U. Sajjan)  
423 in 1% BSA PBS overnight at 4°C. Cells were then washed with PBS and incubated with an  
424 anti-rabbit FITC conjugated antibody for 1 hour at 4°C. Cells were then washed twice with  
425 PBS for 5 min. Nuclei were counterstained with DAPI (VectaShield) and visualised using an  
426 Olympus FV-1000 confocal microscope. Bacterial attachment was expressed as number of  
427 bacteria per 100 cells in 10 randomly selected fields.

428

#### 429 **Cytokine secretion by CFBE41o<sup>-</sup> cells following infection with *B. cenocepacia* strains.**

430 CFBE41o<sup>-</sup> cells were seeded at a density of  $4 \times 10^5$  cells / well in a 24-well plate in antibiotic  
431 medium for 24 hours followed by a further 24 hours in antibiotic and serum free medium prior  
432 to infection with *B. cenocepacia*. Overnight cultures of each strain were added to fresh LB  
433 medium and grown to an OD<sub>600nm</sub> of between 0.4 – 0.8. Each strain ( $2 \times 10^7$  CFU / ml, MOI  
434 50:1) in MEM was added to each well in duplicate and incubated for 24 hours at 37°C and 5%  
435 CO<sub>2</sub>, then centrifuged at 315 x g for 12 min and supernatants transferred to -80°C for storage  
436 prior to assay. Interleukin-8 (IL-8) and IL-6 secretion was determined using OptEIA™ ELISA  
437 kits (Becton Dickenson) according to manufacturer's instructions and the absorbance measured  
438 at 450 nm and 570 nm on the Biotek Synergy H1 Multiplate reader.

439

#### 440 **Bacterial uptake and survival in U937 macrophage cells.**

441 The internalisation of *B. cenocepacia* strains by U937 macrophages was determined as  
442 previously described [42]. Briefly overnight cultures of each strain were transferred to fresh  
443 LB broth and incubated until mid-logarithmic phase ( $OD_{600nm}$  of 0.6 – 0.8) and diluted to an  
444 MOI of 5:1 ( $2.5 \times 10^6$  CFU / ml) in RPMI medium. U937 cells were seeded at  $5 \times 10^5$  cells /  
445 ml in a 24-well plate, differentiated with PMA, washed twice with PBS, and 1 ml of each  
446 bacterial culture applied in duplicate. The CFU applied was confirmed by serial dilution of  
447 aliquots in Ringer's and plating in duplicate. The 24-well plates were centrifuged at  $1100 \times g$   
448 for 5 min, incubated at  $37^\circ C$ , 5%  $CO_2$  for two hours, before washing with PBS. Extracellular  
449 bacteria were killed with amikacin/ceftazidime (1mg/ml each) for two hours at  $37^\circ C$ , 5%  $CO_2$ .  
450 Wells were then washed 5 times with sterile PBS before cells were lysed with 0.25% Triton X-  
451 100 for 15 min and scraped, diluted and plated as outlined above. To examine intracellular  
452 survival of *B. cenocepacia* in U937 macrophage, bacteria were incubated with U937 as  
453 described above and after two hours incubation with each strain, the wells were washed PBS  
454 before addition of RPMI amikacin/ ceftazidime (1 mg/ml each ) to each well and incubation  
455 for a further 2 hours at  $37^\circ C$ , 5%  $CO_2$ . The wells were subsequently washed twice with PBS  
456 and fresh antibiotics replaced and incubated at  $37^\circ C$ , 5%  $CO_2$  for various time points. Cells  
457 were then washed, lysed, diluted and plated as described above and CFU determined after 48  
458 h. The % survival was calculated as the intracellular CFU/ml at each time point relative to the  
459 starting CFU/ml at time zero.

460

#### 461 **Isolation of human peripheral mononuclear cells (PBMC) and differentiation**

462 Ethical approval was obtained from the St Vincent's University Hospital Research Ethics  
463 committee. Age and gender matched adults with CF with no history of Bcc infection were  
464 recruited from St Vincent's University Hospital and blood samples were collected in EDTA  
465 tubes and diluted with the same volume of Dulbecco's PBS (DPBS) and mixed by inversion.

466 PBMCs were isolated by layering the blood over using Ficoll-Paque plus (GE Healthcare) and  
467 centrifuging at 400 x g for 30 min at room temperature without braking. Upper layers  
468 containing plasma and platelets were removed and the layers containing mononuclear cells  
469 were transferred to a fresh tube containing three volumes of DPBS. Cells were centrifuged at  
470 400 x g for 15 min at room temperature, resuspended in 8 ml DPBS and centrifuged at 100 x g  
471 for 10 min at to remove platelets. The cells were resuspended in RPMI, cryopreserved at 2 x  
472 10<sup>6</sup> cells per ml in 40% FBS, 10% DMSO, 50% RPMI (v/v) and stored in liquid nitrogen.  
473 Stored vials were revived as required and added to 5 ml RPMI 1640 (Sigma) medium (with no  
474 additives) and centrifuged at 100 x g for 15 min. The pellets were resuspended in 5 ml of RPMI  
475 1640, transferred to a T25 and incubated at 37°C, 5% CO<sub>2</sub> for two hours to allow the PBMCs  
476 to adhere to the flask. The cells were washed four times with warmed Mg<sup>++</sup> and Ca<sup>++</sup> free  
477 Dulbecco's PBS. Full RPMI 1640 medium containing 10 % autologous Human Serum  
478 (Sigma), 10 mM HEPES (pH 7.0 – 7.6), 1mg / 100 units Penicillin / Streptomycin, 4.5 g/L D-  
479 glucose, 1 mM sodium pyruvate and 1 X non-essential amino acids (Sigma) were added to the  
480 flasks and the cells incubated with macrophage colony-stimulating factor (25 ng/ml, MC-  
481 SF)(MSC) at 37°C, 5% CO<sub>2</sub> for 7 days with half media changes every 3 days. The cells were  
482 harvested from the T25 flask by addition of porcine trypsin / EDTA (Sigma) in PBS and  
483 incubated at 37°C for 20 min. Cells were gently removed from the flask with a cell scraper and  
484 added to full RPMI medium and centrifuged at 252 x g for 10 min. Cells were resuspended in  
485 1 ml of full RPMI medium, counted and diluted to the required concentration of cells in a 24-  
486 well plate. Plates were then incubated for 24 hours at 37°C prior use. Bacterial uptake and  
487 survival were then determined in the monocyte-derived macrophage cells as described for  
488 U937 cells.

489

490 ***Galleria mellonella* acute infection model.**

491 To determine the acute virulence of the bacterial strains, the *Galleria mellonella* wax moth  
492 larvae (Livefoods direct, Sheffield UK) were maintained at 15°C for seven days post-delivery  
493 prior to use and used within 4 weeks [43]. Overnight cultures of each bacterial strain were  
494 inoculated into 100 ml LB and grown to mid-logarithmic phase (OD<sub>600nm</sub> of 0.6-0.8), diluted  
495 to ~ 1 x 10<sup>6</sup> CFU / ml and centrifuged at 2500 x g for 10 min. Pellets were resuspended in 2 ml  
496 PBS and serially diluted to 10<sup>-7</sup> in PBS and an aliquot of 20 µl of each dilution was injected  
497 into the hindmost left proleg of 10 healthy larvae weighing between 0.2 and 0.4 g using a sterile  
498 terumo 0.3 ml syringe. The bioburden injected was confirmed by serial dilution and plating.  
499 The larvae were then incubated at 37°C and the % survival of the larvae determined over 72h  
500 and plotted against the CFU bioburden inoculated value to calculate the LD<sub>50</sub> value for each  
501 strain.

502

### 503 **Assessment of environmental stress responses**

504 A number of environmental stresses experienced during chronic infection within the CF lung  
505 and macrophage environment were tested on each of the *B. cenocepacia* strains.

506 Controlled Hypoxia at 6% O<sub>2</sub>: LB was equilibrated in a controlled hypoxia chamber (Coy  
507 Laboratories) at 6% oxygen for 24h. Overnight cultures of the bacterial strains (10 ml) were  
508 centrifuged at 4000 x g for 15 min, resuspended in 10 ml fresh LB, transferred to 40 ml hypoxia  
509 equilibrated LB in 100 ml conical flask, and incubated statically at 37°C and 6 % O<sub>2</sub>. Aliquots  
510 were sampled at 24 hour intervals over 8 days, serially diluted to 10<sup>-7</sup> in Ringer's solution,  
511 plated onto LB agar plates in duplicate and then incubated at 37°C for 48 hours in normoxic  
512 conditions before enumeration.

513 Low pH: Overnight cultures were diluted 1:100 LB broth at either pH 4.5 or standard pH ~7.5  
514 and 300 µl aliquots added in duplicate to the wells of a 96-well round bottomed plate. The  
515 plates were incubated at 37°C, with orbital shaking and OD<sub>600nm</sub> measured every 15 min for 24

516 hours. Cell viability in low pH was also determined by inoculating a 100 ml flask of LB broth  
517 at pH 4.5 with 10 ml of an overnight culture and incubated at 37°C, 170 rpm and plating hourly  
518 samples as described previously.

519 High osmolarity: The effect of high osmolarity was determined in each *B. cenocepacia* strain  
520 by adding 300 µl of a range of concentrations of NaCl (0 – 5% w/v) or sucrose (0 – 50%) to  
521 rows of a 96-well plate. Overnight cultures were added to each well (3 µl) in duplicate and the  
522 plates were incubated in a Biotek Synergy H1 multiplate reader at 37°C for 24 hours with  
523 OD<sub>600nm</sub> measured every 15 min.

524 Oxidative Stress: The effects of oxidative stress on the *B. cenocepacia* strains was assessed  
525 firstly by exposing the strains to a series of concentrations of organic peroxide (*tert*-butyl  
526 hydroperoxide) and inorganic peroxide (hydrogen peroxide, H<sub>2</sub>O<sub>2</sub>). Overnight cultures of each  
527 strain were diluted 1:100 in fresh LB broth and 270 µl added in duplicate to corresponding  
528 wells in a 96-well plate. A series of concentrations of either H<sub>2</sub>O<sub>2</sub> (0 – 1 mM) or *tert*-butyl  
529 hydroperoxide (0 – 200 µM) were added to the wells and growth determined in a Syngery H1  
530 microplate reader at 37°C at medium shaking and OD<sub>600nm</sub> measured every 15 min for 20 hours.  
531 Viability of bacterial cells in an oxidative stress environment was also examined by treating  
532 cultures with 700 µM H<sub>2</sub>O<sub>2</sub> and incubated at 37°C, 200 rpm. Hourly samples were serially  
533 diluted in Ringer's solution, and plated in duplicate to determine CFU / ml.

534 Heat Stress at 42°C: The effect of heat on each *B. cenocepacia* strain was determined by  
535 transferring 10 ml of overnight cultures of each strain into 100 ml of pre-warmed (42°C) LB  
536 and incubation at 42°C, 200 rpm. Hourly samples were diluted in Ringer's solution, plated and  
537 enumerated after 48h.

538 Long term Nutrient Starvation: Long term nutrient starvation on each *B. cenocepacia* strain  
539 was assessed as per Silva *et al* (2013). Overnight cultures of each strain grown in LB broth  
540 were centrifuged at 4000 x g for 5 min and pellets were washed twice in 0.9 % w/v NaCl and

541 resuspended in 9 ml of M63 medium ( 2 g/L ammonium sulphate, 13.6 g/L potassium  
542 phosphate monobasic, 0.5 mg/L Iron (II) sulphate, 0.2 g/L Magnesium sulfate) with no carbon  
543 source. This was then added to 41 ml M63 medium in a 100 ml conical flask and incubated at  
544 37°C with agitation of 200 rpm. Aliquots were taken for 28 days, serially diluted in Ringer's  
545 solution, plated and counted after 48h incubation.

546

#### 547 **Assessment of cell permeability by Hoechst 33324**

548 The cellular permeability of each strain was assessed by diluting overnight cultures 1:10 in  
549 fresh LB medium, incubating at 37°C, 200 rpm for 5 hours, centrifuging at 4,000 x g for 3 min  
550 and resuspending in sterile PBS. Each strain was then diluted to an OD<sub>600nm</sub> of 0.1 with sterile  
551 PBS and 180 µl added to 8 replicate wells of a row in a black, fluorescence 96-well plate and  
552 2.5 µM of Hoechst 33324 added [44]. The plates were incubated in a Biotek Synergy H1  
553 Multiplate reader at 37°C, medium shaking and fluorescence was measured every minute for 2  
554 hours at an excitation of 355 nm and an emission of 460 nm. The mean fluorescence of 8  
555 replicate wells was calculated for each strain and normalised with the T<sub>0</sub> value.

556

#### 557 **Homology modelling**

558 The homology model structures of BCAM0276 and BCAM0292 were obtained after  
559 consensus-based sequence alignment using the HHpred tool. The best model template for  
560 BCAM0276 was identified as the structure of the TeaD stress protein from the TRAP  
561 transporter TeaABC of *Halomonas elongata* (PDB code 3hgm, seqid 34.3%). For BCAM0292,  
562 the best template was the BupsA stress protein from *Burkholderia pseudomallei* (PDB code  
563 4wny, seqid 69.2%). Using these alignments, the homology models were built using the  
564 program MODELLER [45]. Electrostatic potential surfaces were computed using the program  
565 Chimera [46].

566

567 **Statistical analysis:**

568 Statistical analysis of host cell attachment, cytokine secretion, CF macrophage uptake and  
569 survival data was performed by one-way ANOVA using Prism software. Two-way ANOVA  
570 was used to analyze growth in the presence of organic and inorganic peroxide, growth under  
571 acidic conditions and nutrient limitation. Statistical analysis of virulence, survival at 8 days in  
572 hypoxic conditions, endpoint OD<sub>600</sub> in acidic conditions, U937 internalisation were performed  
573 using a student's t-test.

574

575 Assessment of antibiotic resistance, mucoidy, motility, biofilm formation was performed as  
576 described in the Supplementary information.

577

578 **Acknowledgements:**

579 We are most grateful to Prof Umadevi Sajjan (University of Michigan) for the gift of the anti-  
580 Bcc antibody. This research was supported by a President's Award from the Institute of  
581 Technology Tallaght, Dublin and a Government of Ireland Postgraduate scholarship Award  
582 (GOIPG/2017/788) from the Irish Research Council and EU COST Action BM1003:  
583 "Microbial cell surface determinants of virulence as targets for new therapeutics in cystic  
584 fibrosis for Short Term Scientific Missions".

585



586 **References:**

- 587 1. O'Connor A, McClean S. The Role of Universal Stress Proteins in Bacterial Infections. *Curr*  
588 *Med Chem* **2017**; 24:3970-9.
- 589 2. Schreiber K, Boes N, Eschbach M, et al. Anaerobic survival of *Pseudomonas aeruginosa* by  
590 pyruvate fermentation requires an Usp-type stress protein. *J Bacteriol* **2006**; 188:659-68.
- 591 3. Boes N, Schreiber K, Härtig E, Jaensch L, Schobert M. The *Pseudomonas aeruginosa*  
592 universal stress protein PA4352 is essential for surviving anaerobic energy stress. *J Bacteriol*  
593 **2006**; 188:6529-38.
- 594 4. Drumm JE, Mi K, Bilder P, et al. *Mycobacterium tuberculosis* universal stress protein  
595 Rv2623 regulates bacillary growth by ATP-Binding: requirement for establishing chronic  
596 persistent infection. *PLoS pathogens* **2009**; 5:e1000460.
- 597 5. Elhosseiny NM, Amin MA, Yassin AS, Attia AS. *Acinetobacter baumannii* universal stress  
598 protein A plays a pivotal role in stress response and is essential for pneumonia and sepsis  
599 pathogenesis. *Int J Med Microbiol* **2015**; 305:114-23.
- 600 6. Nyström T, Neidhardt FC. Effects of overproducing the universal stress protein, UspA, in  
601 *Escherichia coli* K-12. *J Bacteriol* **1996**; 178:927-30.
- 602 7. Nyström T, Neidhardt FC. Cloning, mapping and nucleotide sequencing of a gene  
603 encoding a universal stress protein in *Escherichia coli*. *Molecular microbiology* **1992**; 6:3187-  
604 98.
- 605 8. Nyström T, Neidhardt FC. Expression and role of the universal stress protein, UspA, of  
606 *Escherichia coli* during growth arrest. *Molecular microbiology* **1994**; 11:537-44.
- 607 9. Vanlaere E, Baldwin A, Gevers D, et al. Taxon K, a complex within the Burkholderia  
608 cepacia complex, comprises at least two novel species, *Burkholderia contaminans* sp. nov.  
609 and *Burkholderia lata* sp. nov. *Int J Syst Evol Microbiol* **2009**; 59:102-11.
- 610 10. Sass AM, Schmerk C, Agnoli K, et al. The unexpected discovery of a novel low-oxygen-  
611 activated locus for the anoxic persistence of *Burkholderia cenocepacia*. *Isme J* **2013**; 7:1568-  
612 81.
- 613 11. Cullen L, O'Connor A, McCormack S, et al. The involvement of the low-oxygen-activated  
614 locus of *Burkholderia cenocepacia* in adaptation during cystic fibrosis infection. *Scientific*  
615 *Reports* **2018**; 8:13386.
- 616 12. Cullen L, O'Connor A, Drevinek P, Schaffer K, McClean S. Sequential *Burkholderia*  
617 *cenocepacia* Isolates from Siblings with Cystic Fibrosis Show Increased Lung Cell  
618 Attachment. *American journal of respiratory and critical care medicine* **2017**; 195:832-5.
- 619 13. Nunvar J, Kalferstova L, Bloodworth RA, et al. Understanding the Pathogenicity of  
620 *Burkholderia contaminans*, an Emerging Pathogen in Cystic Fibrosis. *PLoS One* **2016**;  
621 11:e0160975.
- 622 14. Winsor GL, Khaira B, Van Rossum T, Lo R, Whiteside MD, Brinkman FS. The *Burkholderia*  
623 Genome Database: facilitating flexible queries and comparative analyses. *Bioinformatics*  
624 **2008**; 24:2803-4.
- 625 15. Elizur A, Cannon CL, Ferkol TW. Airway inflammation in cystic fibrosis. *Chest* **2008**;  
626 133:489-95.
- 627 16. Roesch EA, Nichols DP, Chmiel JF. Inflammation in cystic fibrosis: An update. *Pediatr*  
628 *Pulmonol* **2018**; 53:S30-S50.
- 629 17. Montgomery ST, Mall MA, Kicic A, Stick SM, Arest CF. Hypoxia and sterile inflammation  
630 in cystic fibrosis airways: mechanisms and potential therapies. *Eur Respir J* **2017**; 49.

- 631 18. Martin DW, Mohr CD. Invasion and intracellular survival of *Burkholderia cepacia*.  
632 *Infection and immunity* **2000**; 68:24-9.
- 633 19. Rosales-Reyes R, Aubert DF, Tolman JS, Amer AO, Valvano MA. *Burkholderia*  
634 *cenoecepacia* type VI secretion system mediates escape of type II secreted proteins into the  
635 cytoplasm of infected macrophages. *PLoS One* **2012**; 7:e41726.
- 636 20. Sousa MC, McKay DB. Structure of the universal stress protein of *Haemophilus*  
637 *influenzae*. *Structure* **2001**; 9:1135-41.
- 638 21. Grandjean Lapierre S, Phelippeau M, Hakimi C, et al. Cystic fibrosis respiratory tract salt  
639 concentration: An Exploratory Cohort Study. *Medicine (Baltimore)* **2017**; 96:e8423.
- 640 22. Zlosnik JE, Hird TJ, Fraenkel MC, Moreira LM, Henry DA, Speert DP. Differential mucoid  
641 exopolysaccharide production by members of the *Burkholderia cepacia* complex. *J Clin*  
642 *Microbiol* **2008**; 46:1470-3.
- 643 23. Esposito C, Cantisani M, D'Auria G, et al. Mapping key interactions in the dimerization  
644 process of HBHA from *Mycobacterium tuberculosis*, insights into bacterial agglutination.  
645 *FEBS Lett* **2012**; 586:659-67.
- 646 24. Esposito C, Marasco D, Delogu G, Pedone E, Berisio R. Heparin-binding hemagglutinin  
647 HBHA from *Mycobacterium tuberculosis* affects actin polymerisation. *Biochem Biophys Res*  
648 *Commun* **2011**; 410:339-44.
- 649 25. Joseph PRB, Sawant KV, Iwahara J, Garofalo RP, Desai UR, Rajarathnam K. Lysines and  
650 Arginines play non-redundant roles in mediating chemokine-glycosaminoglycan  
651 interactions. *Sci Rep* **2018**; 8:12289.
- 652 26. Mendelsohn L, Wijers C, Gupta R, Marozkina N, Li C, Gaston B. A novel, noninvasive  
653 assay shows that distal airway oxygen tension is low in cystic fibrosis, but not in primary  
654 ciliary dyskinesia. *Pediatr Pulmonol* **2019**; 54:27-32.
- 655 27. Scholte BJ, Horati H, Veltman M, et al. Oxidative stress and abnormal bioactive lipids in  
656 early cystic fibrosis lung disease. *J Cyst Fibros* **2019**; 18:781-9.
- 657 28. Seifart Gomes C, Izar B, Pazan F, et al. Universal stress proteins are important for  
658 oxidative and acid stress resistance and growth of *Listeria monocytogenes* EGD-e in vitro  
659 and in vivo. *PLoS One* **2011**; 6:e24965.
- 660 29. Nachin L, Nannmark U, Nyström T. Differential roles of the universal stress proteins of  
661 *Escherichia coli* in oxidative stress resistance, adhesion, and motility. *J Bacteriol* **2005**;  
662 187:6265-72.
- 663 30. Jia Q, Hu X, Shi D, et al. Universal stress protein Rv2624c alters abundance of arginine  
664 and enhances intracellular survival by ATP binding in mycobacteria. *Sci Rep* **2016**; 6:35462.
- 665 31. Leveque M, Le Trionnaire S, Del Porto P, Martin-Chouly C. The impact of impaired  
666 macrophage functions in cystic fibrosis disease progression. *J Cyst Fibros* **2017**; 16:443-53.
- 667 32. Tolman JS, Valvano MA. Global changes in gene expression by the opportunistic  
668 pathogen *Burkholderia cenoecepacia* in response to internalization by murine macrophages.  
669 *BMC Genomics* **2012**; 13:63.
- 670 33. de Souza CS, Torres AG, Caravelli A, Silva A, Polatto JM, Piazza RM. Characterization of  
671 the universal stress protein F from atypical enteropathogenic *Escherichia coli* and its  
672 prevalence in Enterobacteriaceae. *Protein Sci* **2016**; 25:2142-51.
- 673 34. Nachin L, Nannmark U, Nystrom T. Differential roles of the universal stress proteins of  
674 *Escherichia coli* in oxidative stress resistance, adhesion, and motility. *J Bacteriol* **2005**;  
675 187:6265-72.

- 676 35. Huang TY, Irene D, Zulueta MM, et al. Structure of the Complex between a Heparan  
677 Sulfate Octasaccharide and Mycobacterial Heparin-Binding Hemagglutinin. *Angew Chem Int*  
678 *Ed Engl* **2017**; 56:4192-6.
- 679 36. Swart M, Troeberg L. Effect of Polarization and Chronic Inflammation on Macrophage  
680 Expression of Heparan Sulfate Proteoglycans and Biosynthesis Enzymes. *J Histochem*  
681 *Cytochem* **2018**:22155418798770.
- 682 37. Zingl FG, Kohl P, Cakar F, et al. Outer Membrane Vesiculation Facilitates Surface  
683 Exchange and In Vivo Adaptation of *Vibrio cholerae*. *Cell Host Microbe* **2020**; 27:225-37 e8.
- 684 38. Flannagan RS, Linn T, Valvano MA. A system for the construction of targeted unmarked  
685 gene deletions in the genus *Burkholderia*. *Environ Microbiol* **2008**; 10:1652-60.
- 686 39. Hamad MA, Di Lorenzo F, Molinaro A, Valvano MA. Aminoarabinose is essential for  
687 lipopolysaccharide export and intrinsic antimicrobial peptide resistance in *Burkholderia*  
688 *cenozoecia*(dagger). *Molecular microbiology* **2012**; 85:962-74.
- 689 40. Hamad MA, Skeldon AM, Valvano MA. Construction of aminoglycoside-sensitive  
690 *Burkholderia cenozoecia* strains for use in studies of intracellular bacteria with the  
691 gentamicin protection assay. *Appl Environ Microbiol* **2010**; 76:3170-6.
- 692 41. Agnoli K, Frauenknecht C, Freitag R, et al. The third replicon of members of the  
693 *Burkholderia cepacia* Complex, plasmid pC3, plays a role in stress tolerance. *Appl Environ*  
694 *Microbiol* **2014**; 80:1340-8.
- 695 42. McKeon S, McClean S, Callaghan M. Macrophage responses to CF pathogens: JNK MAP  
696 kinase signaling by *Burkholderia cepacia* complex lipopolysaccharide. *FEMS Immunol Med*  
697 *Microbiol* **2010**:DOI:10.1111/j.574-695X.2010.00712.x.
- 698 43. Costello A, Herbert G, Fabunmi L, et al. Virulence of an emerging respiratory pathogen,  
699 genus *Pandora*, in vivo and its interactions with lung epithelial cells. *J Med Microbiol*  
700 **2011**; 60:289-99.
- 701 44. Coldham NG, Webber M, Woodward MJ, Piddock LJ. A 96-well plate fluorescence assay  
702 for assessment of cellular permeability and active efflux in *Salmonella enterica* serovar  
703 *Typhimurium* and *Escherichia coli*. *J Antimicrob Chemother* **2010**; 65:1655-63.
- 704 45. Bitencourt-Ferreira G, de Azevedo WF, Jr. Homology Modeling of Protein Targets with  
705 MODELLER. *Methods Mol Biol* **2019**; 2053:231-49.
- 706 46. Yang Z, Lasker K, Schneidman-Duhovny D, et al. UCSF Chimera, MODELLER, and IMP: an  
707 integrated modeling system. *J Struct Biol* **2012**; 179:269-78.
- 708
- 709
- 710
- 711
- 712

713

714 **Tables and Figures**

715

716 **Table 1:** USPs encoded on the *lxa* locus in *B. cenocepacia* J2315

717

| Gene     | Predicted MW | Predicted pI | Subcellular Localisation (PSortb) |
|----------|--------------|--------------|-----------------------------------|
| BCAM0276 | 17016.4      | 8.23         | cytoplasmic                       |
| BCAM0290 | 16139.1      | 4.61         | unknown                           |
| BCAM0291 | 30520.5      | 6.74         | cytoplasmic                       |
| BCAM0292 | 17743.9      | 4.82         | unknown                           |
| BCAM0294 | 30586.3      | 6.75         | unknown                           |
| BCAM0319 | 33622.2      | 6.86         | unknown                           |
|          |              |              |                                   |

718 Data taken from Burkholderia Genome database ([www.burkholderia.com](http://www.burkholderia.com)) [14]

719

720

721

722

723 **Table 2.** Comparison of phenotypes in USP76 and USP92.

724

| Phenotype                         | USP76  | USP92  |
|-----------------------------------|--------|--------|
| Growth and or survival in         |        |        |
| Low pH                            | +      | +      |
| Osmotic stress                    | -      | +      |
| Oxidative stress                  | +      | -      |
| Nutrient limitation               | +      |        |
| Osmolarity                        |        | +      |
| Hypoxia                           | +++    |        |
| Host cell attachment              | +++    | -      |
| Cytokine secretion                | +      |        |
| Virulence in <i>G. mellonella</i> | -      | +      |
| Membrane permeability             | slight | Slight |
| Mucoidy                           | -      | -      |
|                                   |        |        |

725

726

727

728 **Figure Legends:**

729

730 **Figure 1: Comparison of the bacterial attachment to CFBE41o<sup>-</sup> cells measured by**  
731 **microbiological plating at an MOI of 50:1. A)** Predicted structure of the USP76 homodimer  
732 using Swiss-Model Expasy. **b)** Comparison of the attachment of WT K56-2 and the  $\Delta usp76$   
733 mutant to CFBE41o<sup>-</sup> lung epithelial cells by (b) microbiological plating and (c & d) confocal  
734 microscopy. **B)** Data represent the mean CFU / ml for each strain in three independent  
735 experiments. Error bars represent the standard error of the mean. \*Signifies a statistically  
736 significant difference in attachment of the  $\Delta usp76$  mutant as determined by one-way ANOVA,  
737  $p = 0.0117$ . **C)** Confocal microscopy images of the attachment of WT K56-2 and the  $\Delta usp76$   
738 mutant to CFBE41o<sup>-</sup> cells at a MOI of 50:1. *B. cenocepacia* cells were labelled with a primary  
739 anti-Bcc antibody and detected with a secondary FITC-conjugated antibody (green). CFBE  
740 nuclei were counterstained with DAPI (blue). **D)** Data represents the mean number of bacteria  
741 / 100 cells of CFBE41o<sup>-</sup> per strain for 10 randomly selected fields of view in three independent  
742 experiments. Error bars represent the standard error of the mean. \* Signifies statistical  
743 significance, using a t test to compare data from three independent experiments, \* $p < 0.0001$ .

744

745

746 **Figure 2: Effect of deletion of BCAM0276 on cytokine response and virulence. A & B)**  
747 **IL-8 and IL-6 cytokine secretion from CFBE41o<sup>-</sup> cells following infection with the WT, the**  
748  **$\Delta usp76$  mutant, the  $\Delta usp76\_usp76$  complement strains or negative control (MEM only). Bars**  
749 **represent the mean level of detected cytokine in triplicate measured in two independent**  
750 **experiments. Error bars represent the standard deviation. Statistical analysis was performed**  
751 **using one-way ANOVA, \* $p = 0.0135$ . C) LD<sub>50</sub> values for the WT and the  $\Delta usp76$  mutant**  
752 **strains in the *G. mellonella* acute infection model at 24 hours. Data represent the mean LD<sub>50</sub>**  
753 **from three independent experiments and error bars represent the standard error of the mean.**

754

755 **Fig 3: Effect of USP76 on survival or growth to environmental conditions. A)** Mean  
756 percentage survival of the WT, the  $\Delta usp76$  mutant and the  $\Delta usp76\_usp76$  complement strains  
757 after 8 days incubation in 6% oxygen in a controlled hypoxia chamber determined in three  
758 independent experiments. Error bars represent the standard error of the mean; \* $p = 0.0258$ . **B**  
759 **& C)** Mean OD<sub>600</sub> values of the WT and  $\Delta usp76$  mutant strains following incubation with a  
760 range of concentrations of **B)** H<sub>2</sub>O<sub>2</sub> or **C)** Tert-butyl hydroperoxide (0 - 1000  $\mu$ M) for 20 hours.  
761 Data displayed was normalised relative to treatment-free control and represent duplicate values  
762 of three independent experiments, \*\*  $p=0.0016$ .

763

764 **Figure 4: Growth and Survival of the  $\Delta usp76$  mutant under induced pH 4.5 stress or**  
765 **nutrient limiting conditions. A)** Mean normalised endpoint OD<sub>600nm</sub> values for each strain  
766 WT, the  $\Delta usp76$  mutant and  $\Delta usp76\_usp76$  complement following incubation in pH 4.5 LB  
767 versus LB medium at pH 7. Data represent the mean normalised absorbance from 3  
768 independent experiments, and error bars represent the standard error. Statistical analysis was  
769 performed by t test, \*\* $p = 0.0068$ . **B)** Normalised survival (CFU/ml) over time for each strain  
770 the  $\Delta usp76$  mutant and the  $\Delta usp76\_usp76$  complement strains compared to T<sub>0</sub> following  
771 incubation in LB pH 4.5. Data represent the mean normalised CFU/ml from 3 independent  
772 experiments, error bars represent the standard error. Statistical analysis by two-way ANOVA,  
773 \*\* $p = 0.0019$ . **C)** Mean % survival of the WT, the  $\Delta usp76$  mutant and the  $\Delta usp76\_usp76$   
774 normalised to Day 0 of each respective strain following incubation in nutrient limiting medium  
775 (glucose free) over the course of 28 days. Data represent the mean % survival of 2 independent  
776 experiments. Statistical analysis performed by two-way ANOVA,  $p = 0.0038$

777  
778  
779  
780  
781  
782  
783  
784  
785  
786  
787  
788  
789  
790  
791  
792  
793  
794  
795  
796  
797  
798  
799  
800  
801  
802  
803  
804  
805  
806  
807  
808  
809  
810  
811  
812  
813  
814  
815  
816  
817  
818  
819  
820  
821  
822  
823

**Figure 5: Uptake and survival of WT, the  $\Delta usp76$  mutant and the  $\Delta usp76\_usp76$  complement strains in U937 macrophage cells.** A) Uptake of the WT, the  $\Delta usp76$  mutant and the  $\Delta usp76\_usp76$  complement strains by differentiated U937 macrophage cells. Data represent the intracellular uptake of the individual strains as a % of bacterial cells applied in three independent experiments. Error bars represent the standard error of the mean. \*\*Statistically significant difference relative to the WT as determined by student t-test,  $p = 0.002$ ); b) Survival of the  $\Delta usp76$  mutant and the  $\Delta usp76\_usp76$  complement strains in U937 macrophage cells over time. Data represent the mean  $\log_{10}$  of CFU/ml from three independent experiments; error bars represent the standard error of the mean. \*Statistically significant difference relative to the WT determined by two-way ANOVA ( $p = 0.0378$ ).

**Figure 6: Uptake and survival of the WT, the  $\Delta usp76$  mutant and the  $\Delta usp76\_usp76$  strains in PBMC-derived macrophage from people with CF.** a) % uptake and b) 24 h survival of the WT (black), the  $\Delta usp76$  mutant (grey bars) or the  $\Delta usp76\_usp76$  complement strain (grey patterned bars). The data represent the means of three independent experiments and error bars represent the standard error of each mean. Statistically significant difference relative to the WT as determined by one-way ANOVA (\*\* $p = 0.0018$ ; \*\*\* $p = 0.0004$ ). b) Survival of the wild type,  $\Delta usp76$  mutant and the  $\Delta usp76\_usp76$  complement strains in CF monocyte-derived macrophage cells. Normalised data represent the mean  $\log$  of CFU/ml from three independent experiments, relative to time zero. Error bars represent the standard error of the mean. Statistically significant difference between mutant and WT strains was determined by one-way ANOVA as follows: CF2:  $p = 0.0403$ ; CF 11,  $p = 0.0016$ ; CF 12  $p = 0.0025$ ; CF13,  $p < 0.0001$ .

**Figure 7: Phenotype analysis of USP92.** A) Calculated  $LD_{50}$  values at 24 hours to determine virulence of the WT and the  $\Delta usp92$  mutant strains in the *G. mellonella* wax moth larva model. Statistically significant difference relative to WT was determined by t-test, \* $p = 0.0228$ ). B) Growth of WT and the  $\Delta usp92$  mutant following incubation with LB broth at a pH of 4.5 for 20 hours as determined by  $OD_{600}$ . Data represent the mean OD values from three independent experiments at each timepoint. Error bars represent the standard error of the mean. Statistical significant difference determined by two-way ANOVA  $p < 0.0001$ . C) Mean endpoint absorbance values of WT and the  $\Delta usp92$  mutant following incubation with concentrations of NaCl (0 – 5% w/v) for 24 hours at 37°C normalised to LB only. \* $p = 0.003$  compared with wild type using two way ANOVA. D) Normalised fluorescence intensity data of the cellular uptake of Hoechst 33324 (excitation 355 nm, emission 460nm) in WT and the  $\Delta usp92$  mutant over a period of two hours, incubated at 37°C. Data represents the mean of eight replicates of each strain, performed on two independent experiments (\* $p < 0.001$ , as determined by two way ANOVA)

**Figure 8: Comparison of USP76 and USP92 protein structures.** a) Cartoon and surface representations of the homology models of (a) USP76 and (b) USP92. The inset shows a detail of ATP binding mode. (c) Structure based sequence alignment as computed by DALI.

824 **Figure 9.** Side (left) and top (right) views of electrostatic potential surfaces of (a) USP76 and  
825 (b) USP92; with red and blue denoting residues with negative and positive electrostatic  
826 potential, respectively. The main residues contributing to the electrostatic potential are labelled.  
827  
828  
829  
830

Figure 1

**A**

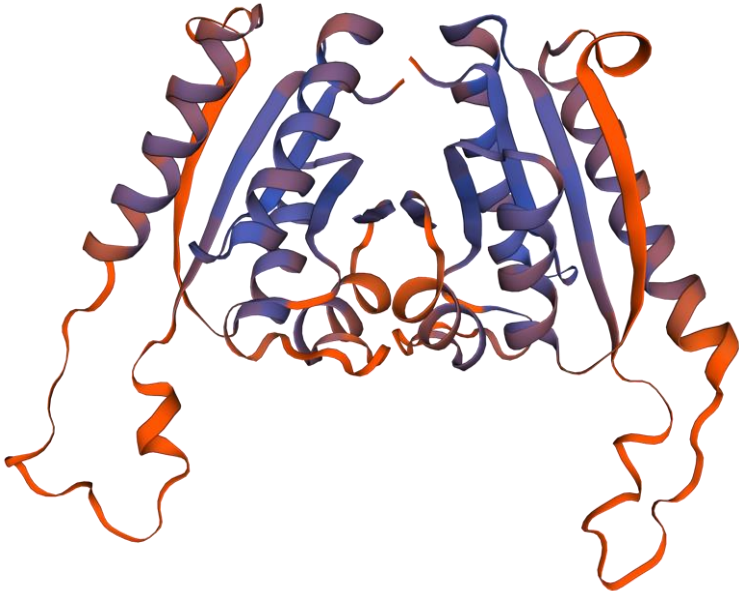

**B**

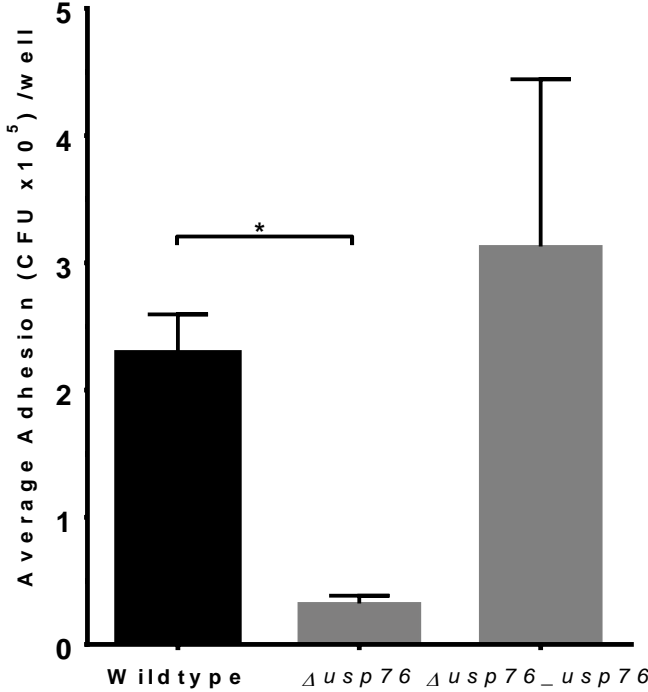

**C**

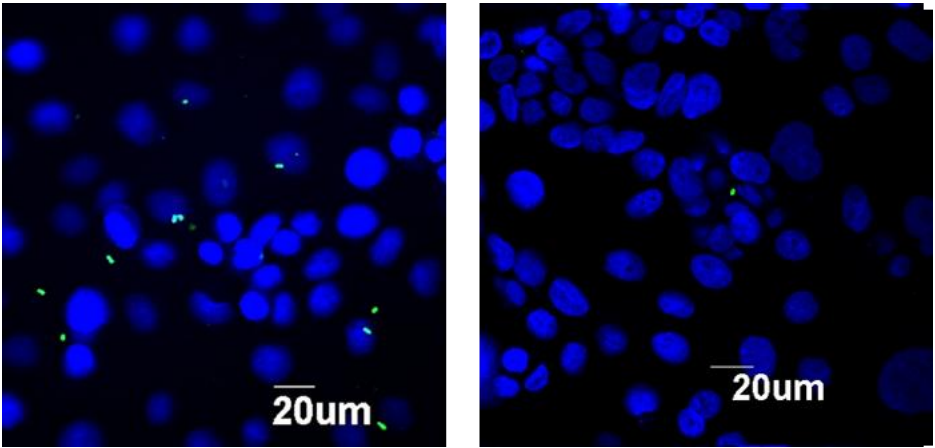

**D**

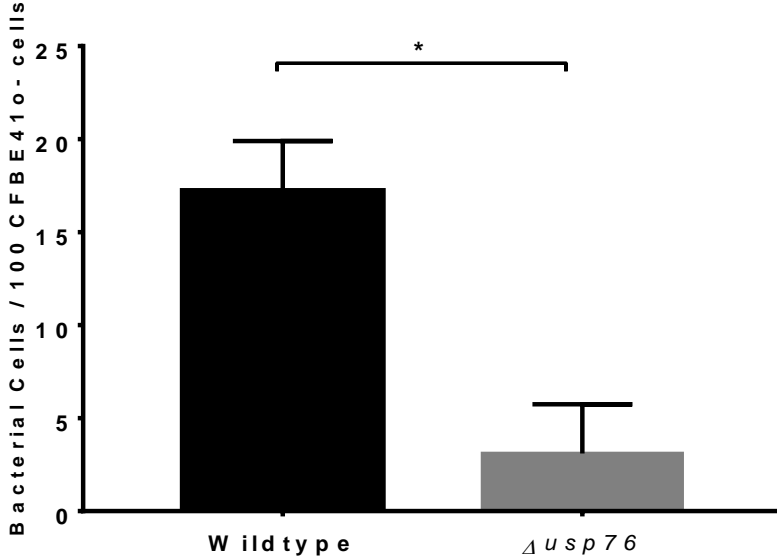



Figure 2

**A**

**IL-8**

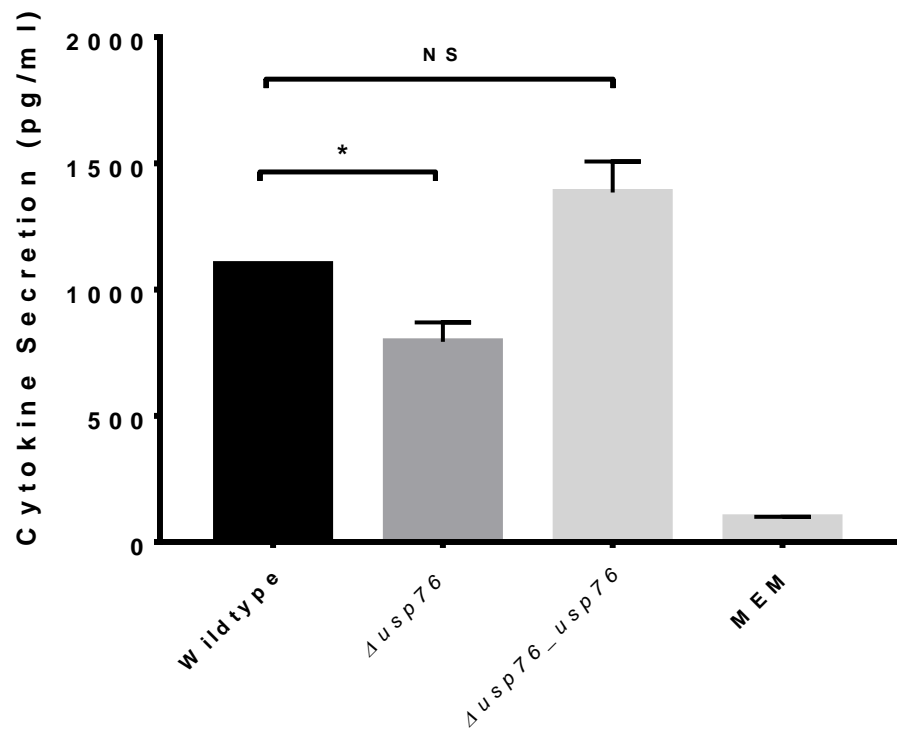

**B**

**IL-6**

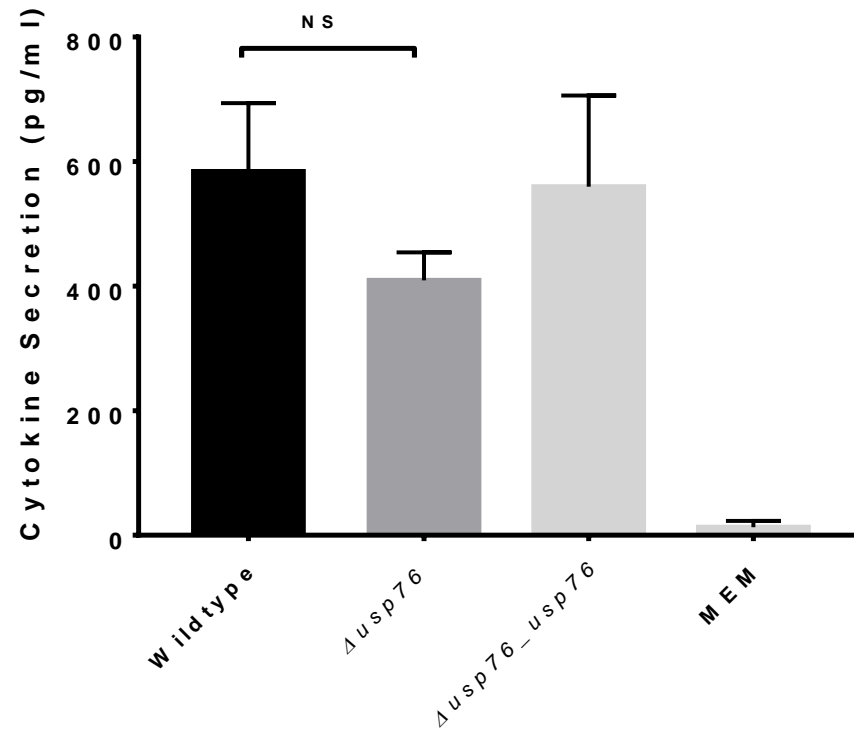

**C**

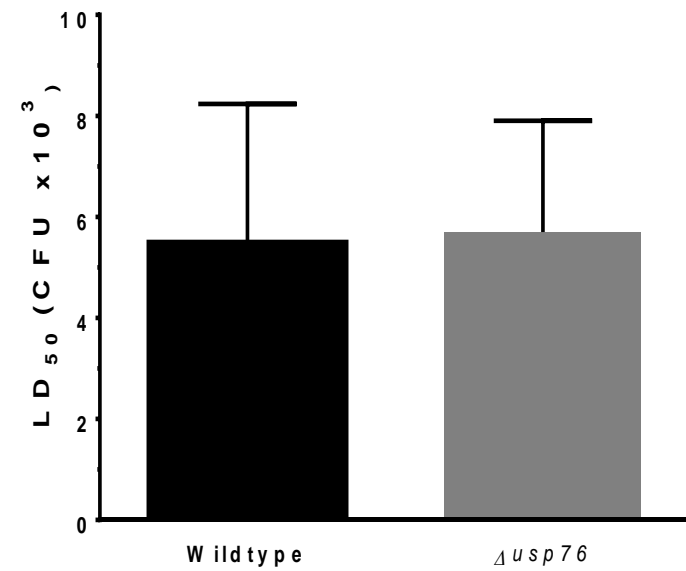

Figure 3

**A**

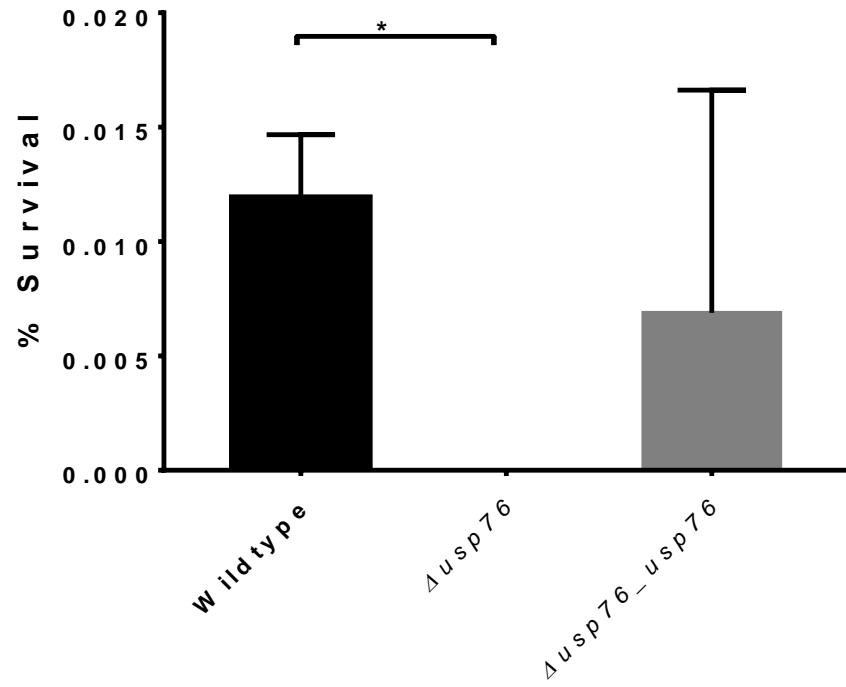

**B**

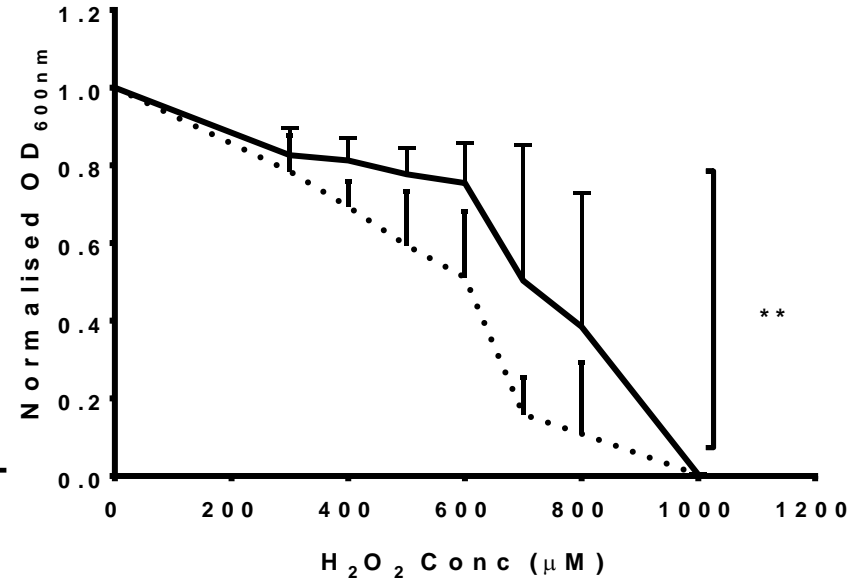

**C**

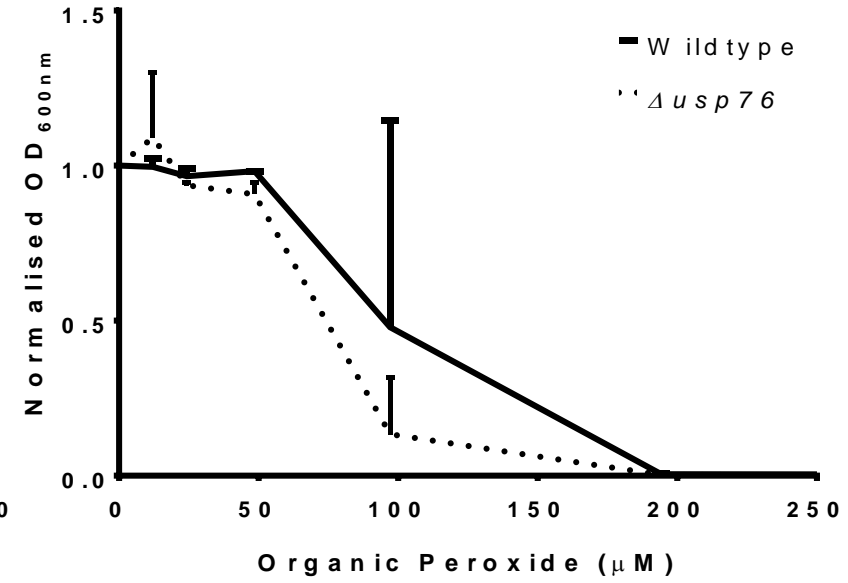

Figure 4

**A**

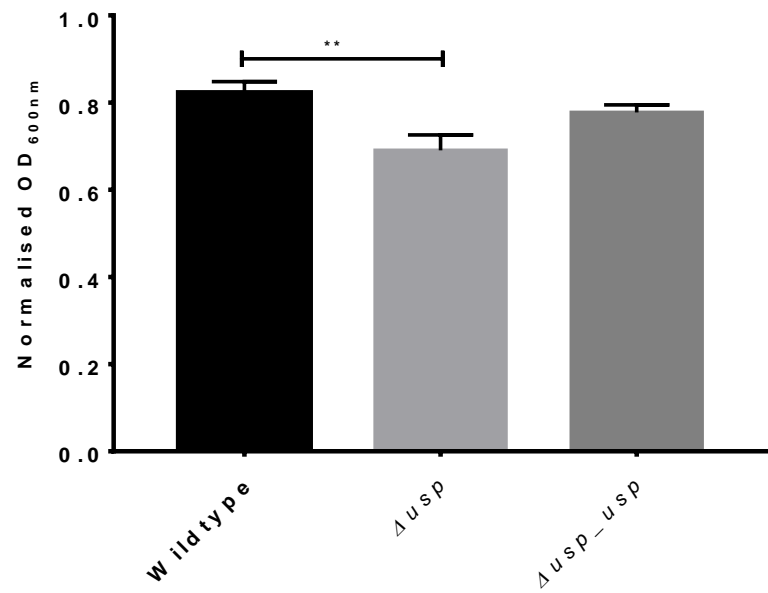

**B**

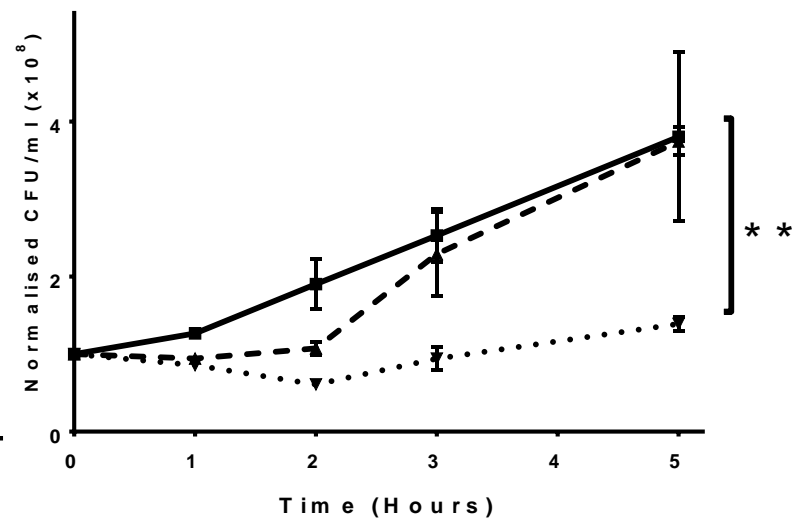

**C**

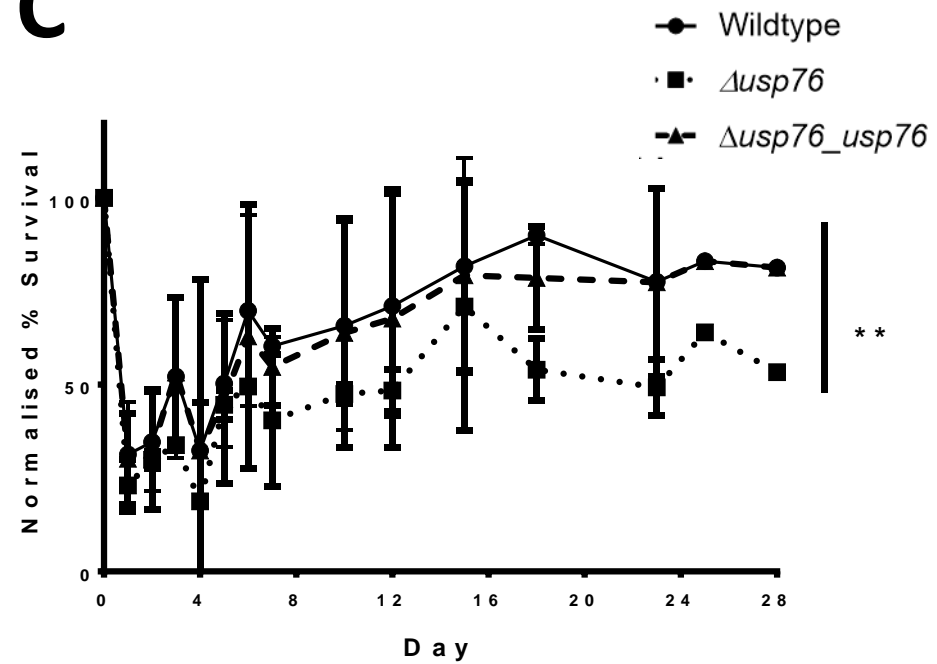

Figure 5

**A**

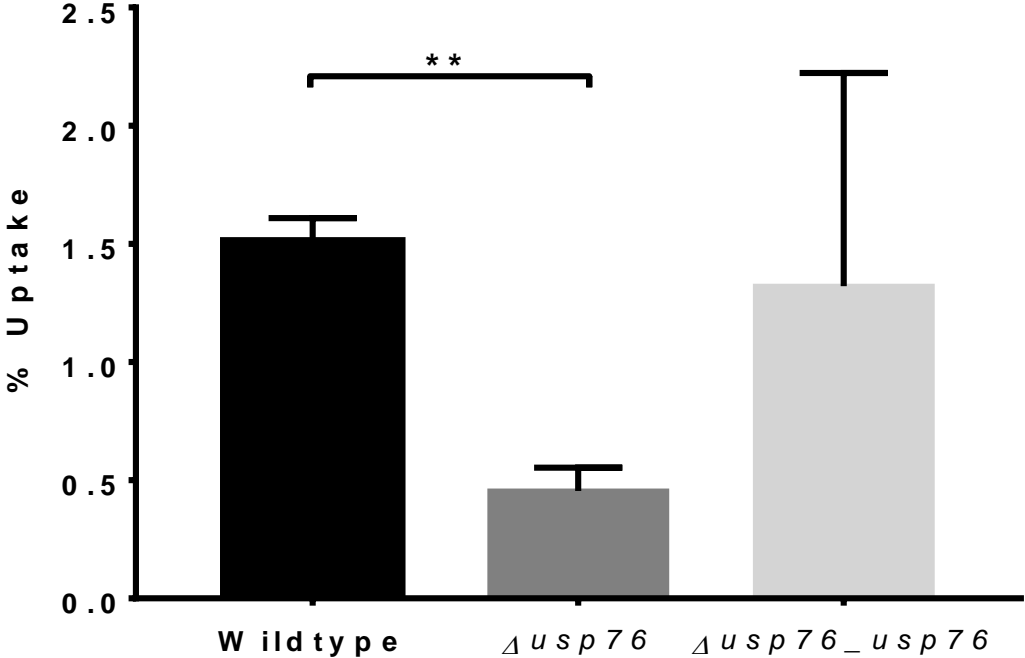

**B**

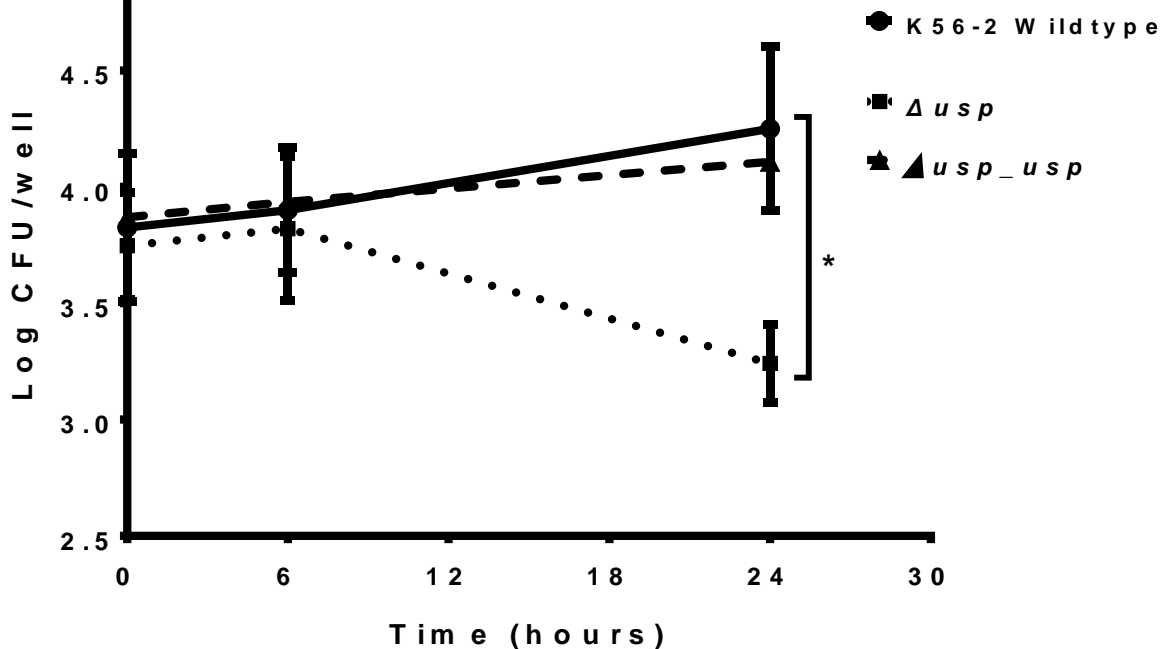

Figure 6.

**A**

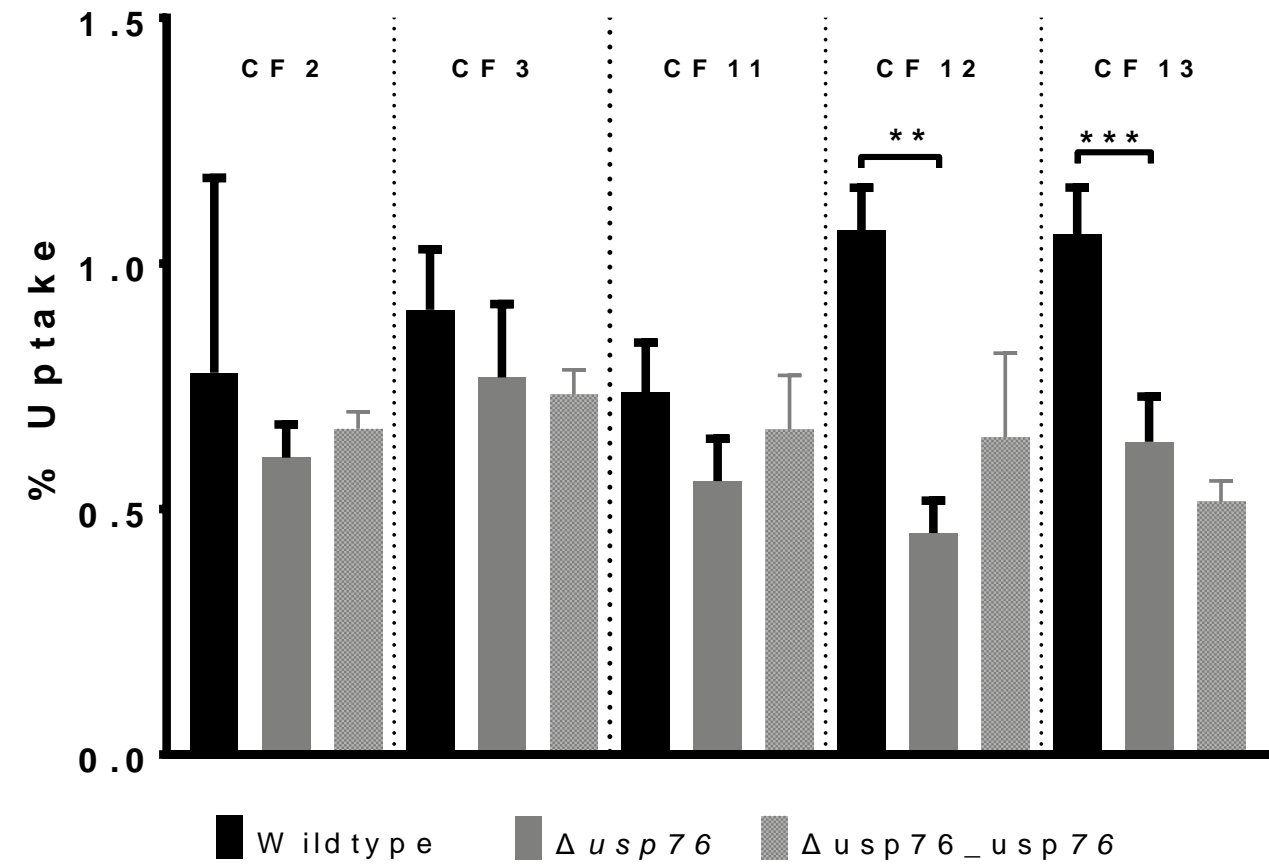

**B**

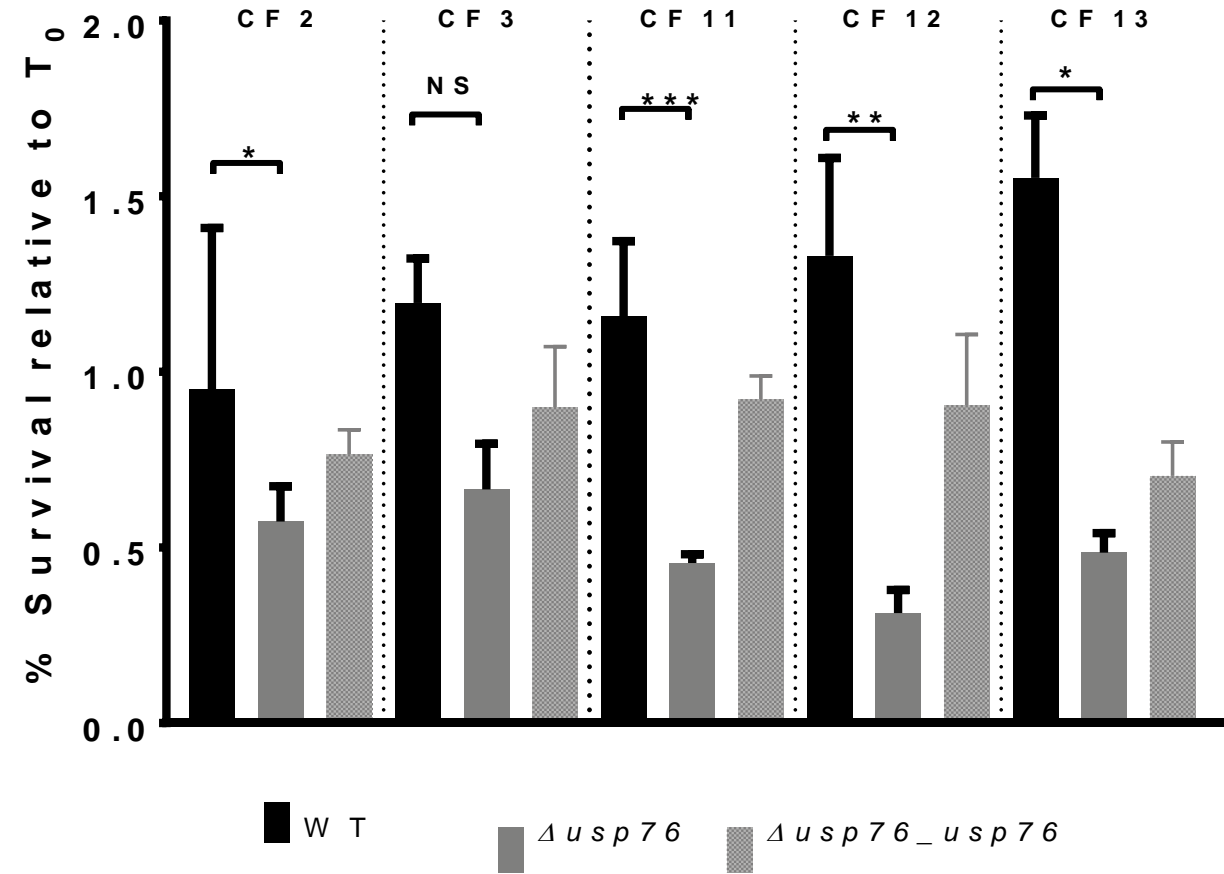

Figure 7

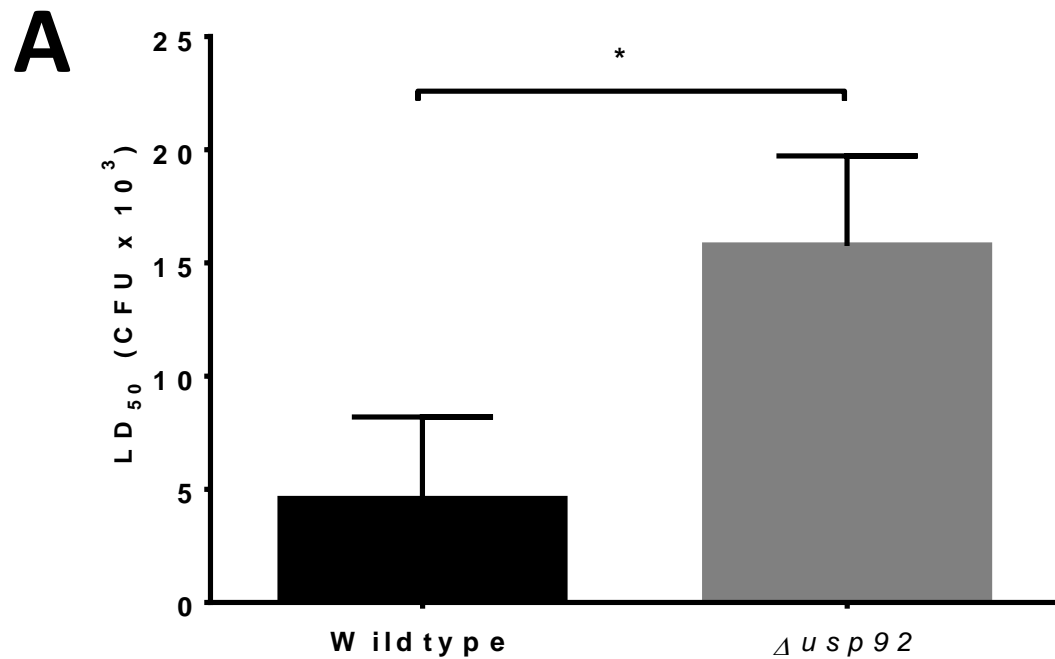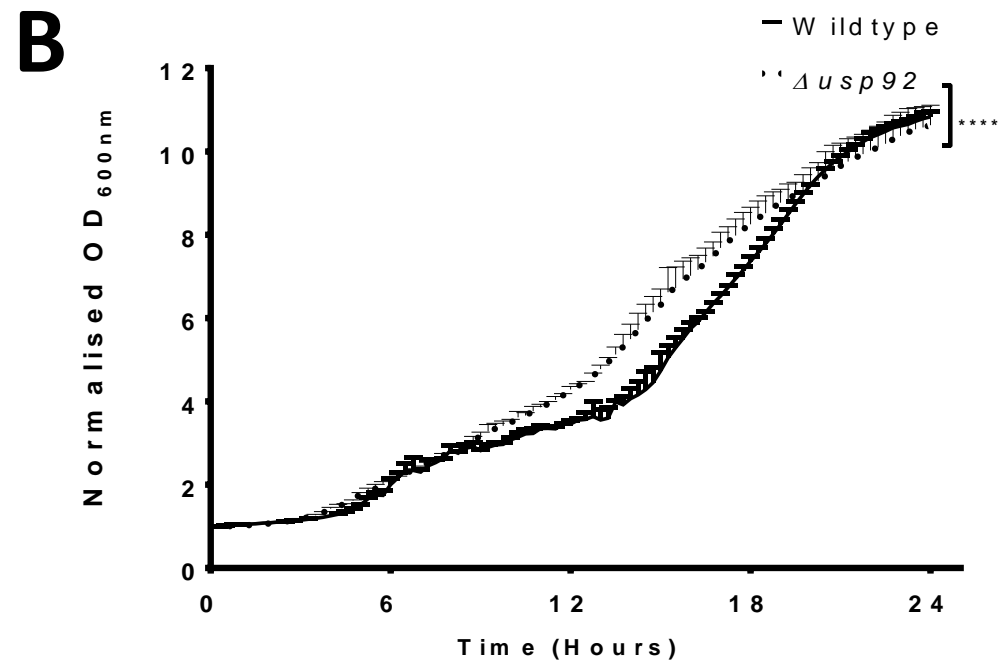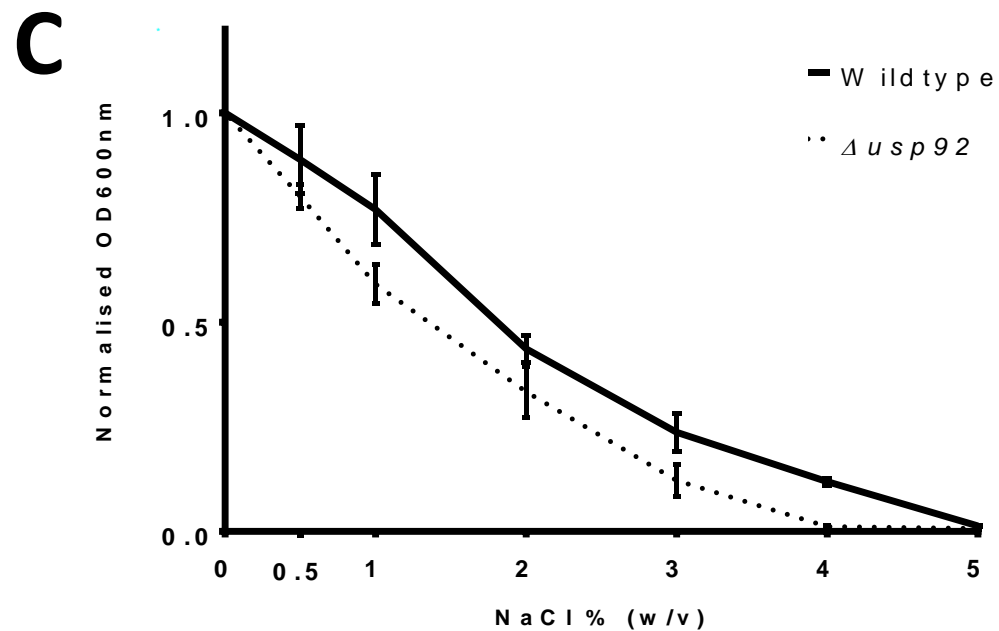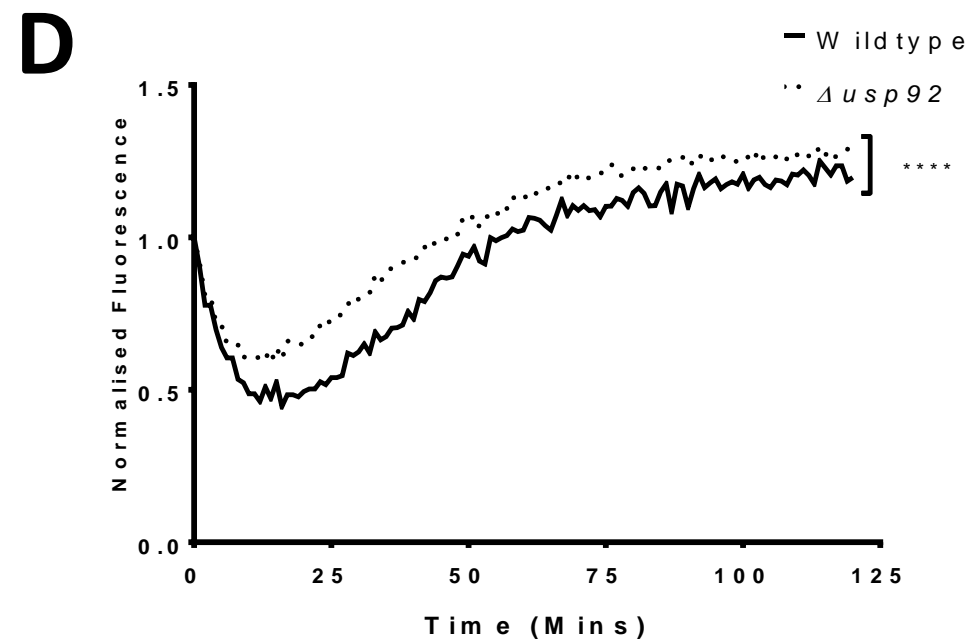



Figure 9

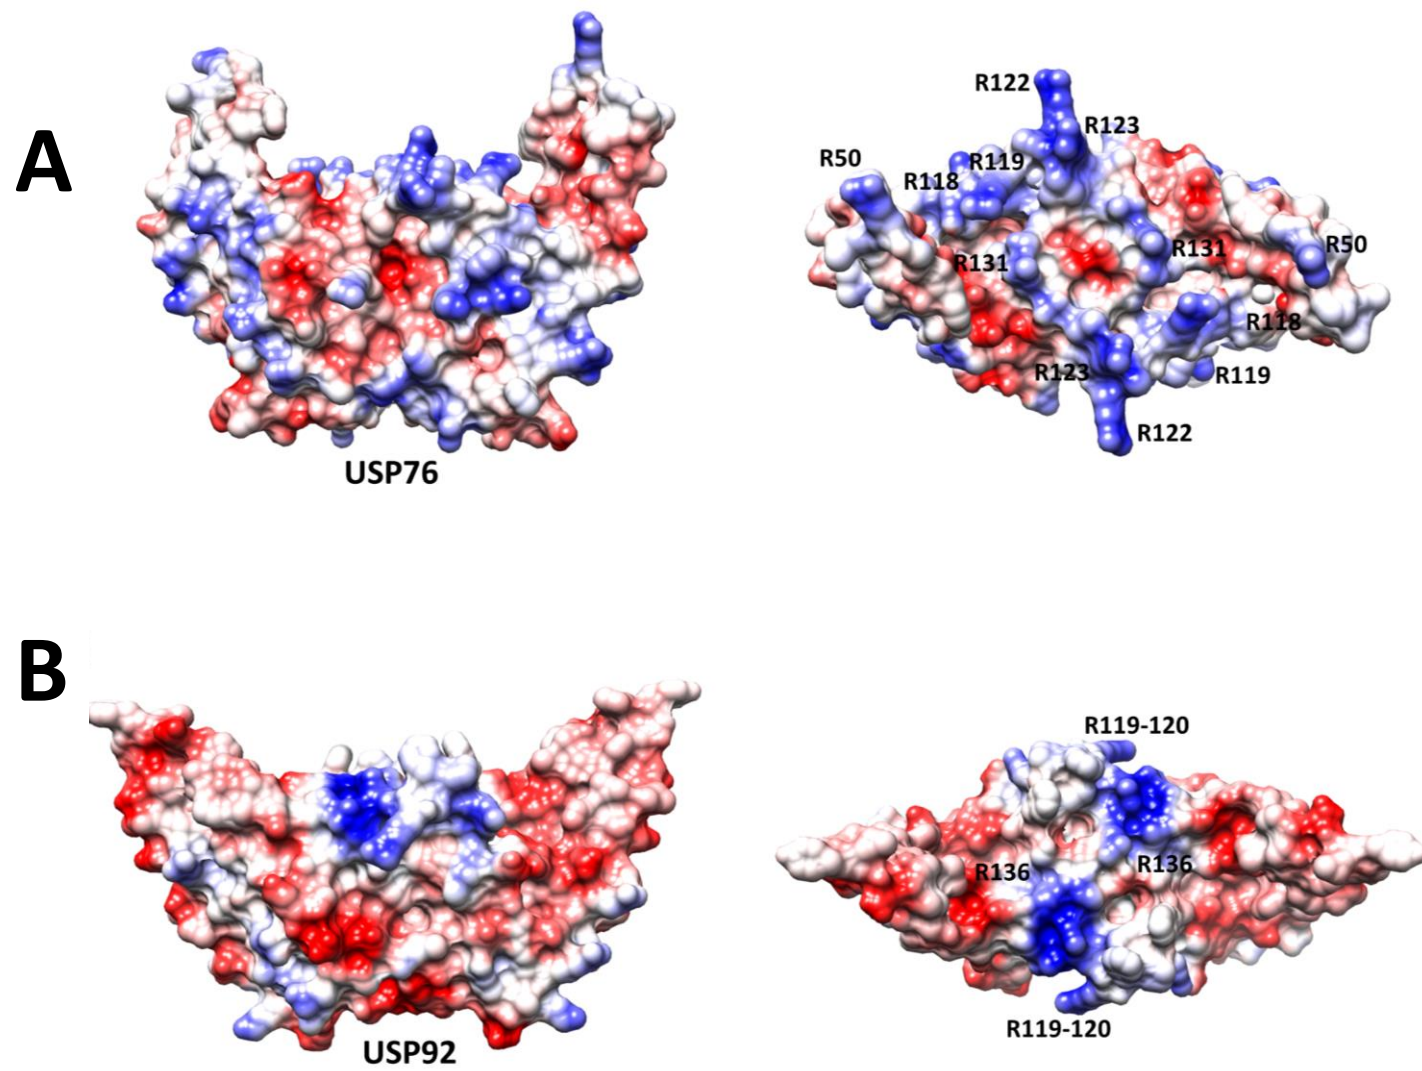

Source: https://www.biorxiv.org/content/10.1101/2020.10.03.324806v1.full.pdf
